# Supplementary material for: Enantioselective Iron/Bisquinolyldiamine Ligand-Catalyzed Oxidative Coupling Reaction of 2-Naphthols
Source: PubMed Central journal article supplement (PMC7070846; doi:10.3390/molecules25040852), 2020-02-14
Supplement: molecules-25-00852-s001.pdf [file molecules-25-00852-s001.pdf]

*Supplementary Materials for*

**Enantioselective Iron/Bisquinolyldiamine Ligand-  
Catalyzed Oxidative Coupling Reaction of 2-Naphthols**

Lin-Yang Wu, Muhammad Usman and Wen-Bo Liu\*

Sauvage Center for Molecular Sciences; Engineering Research Center of Organosilicon Compounds & Materials, Ministry of Education; College of Chemistry and Molecular Sciences; Wuhan University, Wuhan, Hubei 430072, China

**Contents**

|                                      |            |
|--------------------------------------|------------|
| <b>Copies of NMR Spectra .....</b>   | <b>S2</b>  |
| <b>Copies of HPLC Spectrum .....</b> | <b>S19</b> |

# Copies of NMR Spectra

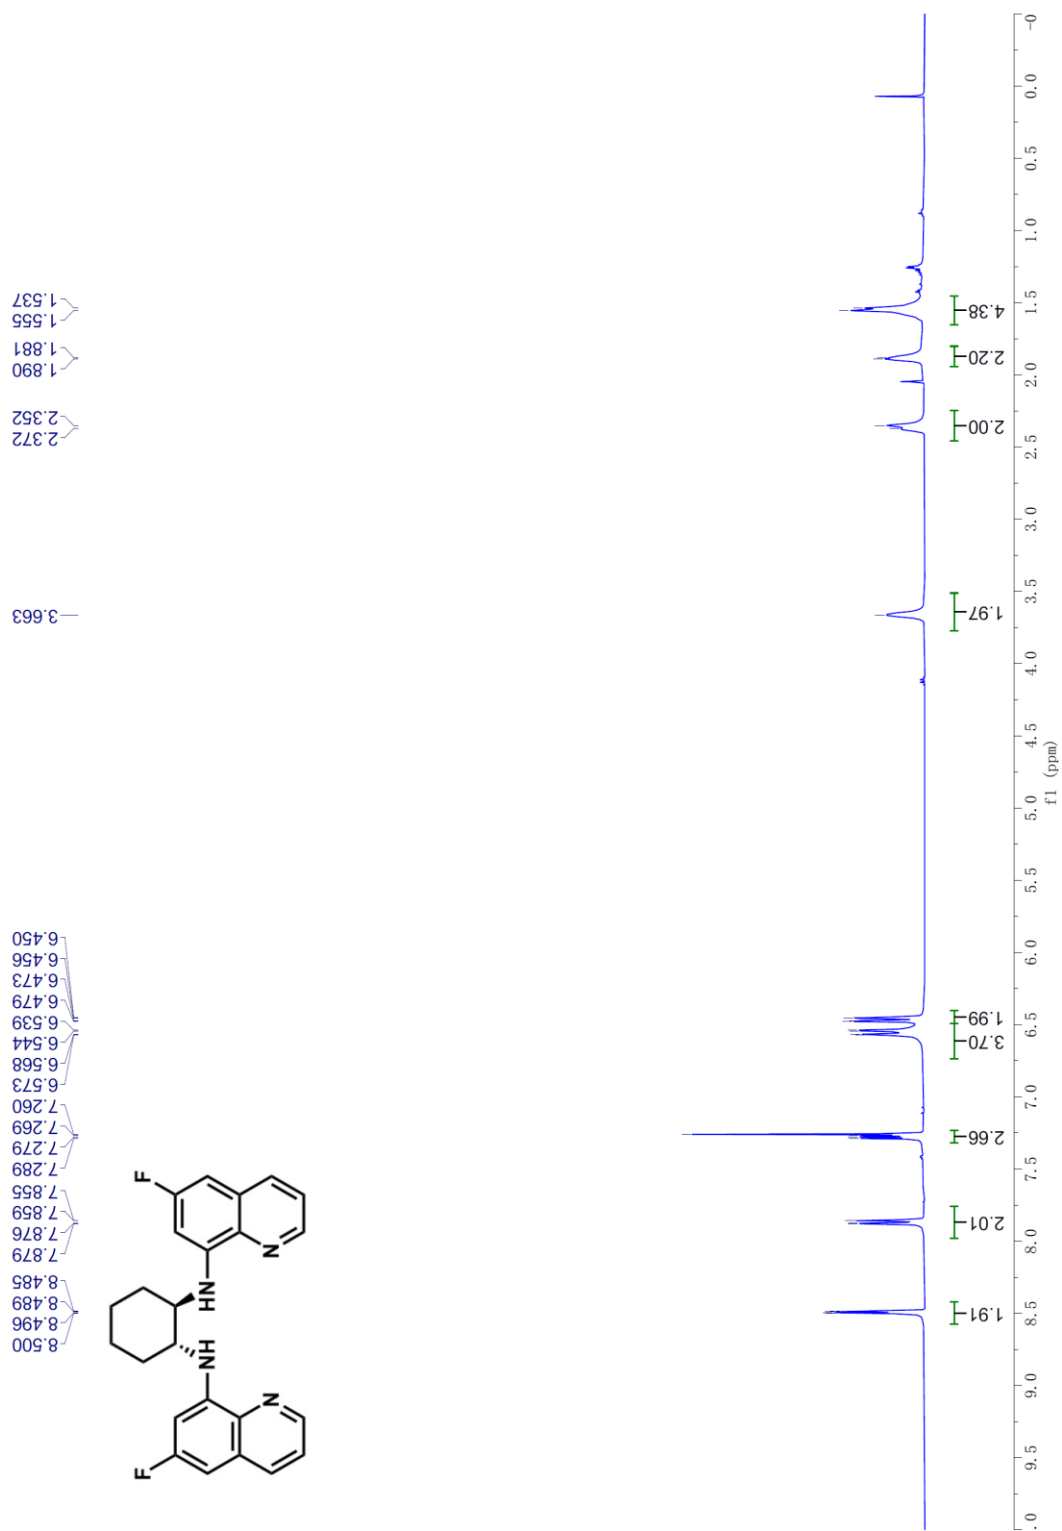

<sup>1</sup>H NMR of L2

<sup>13</sup>C NMR of L2

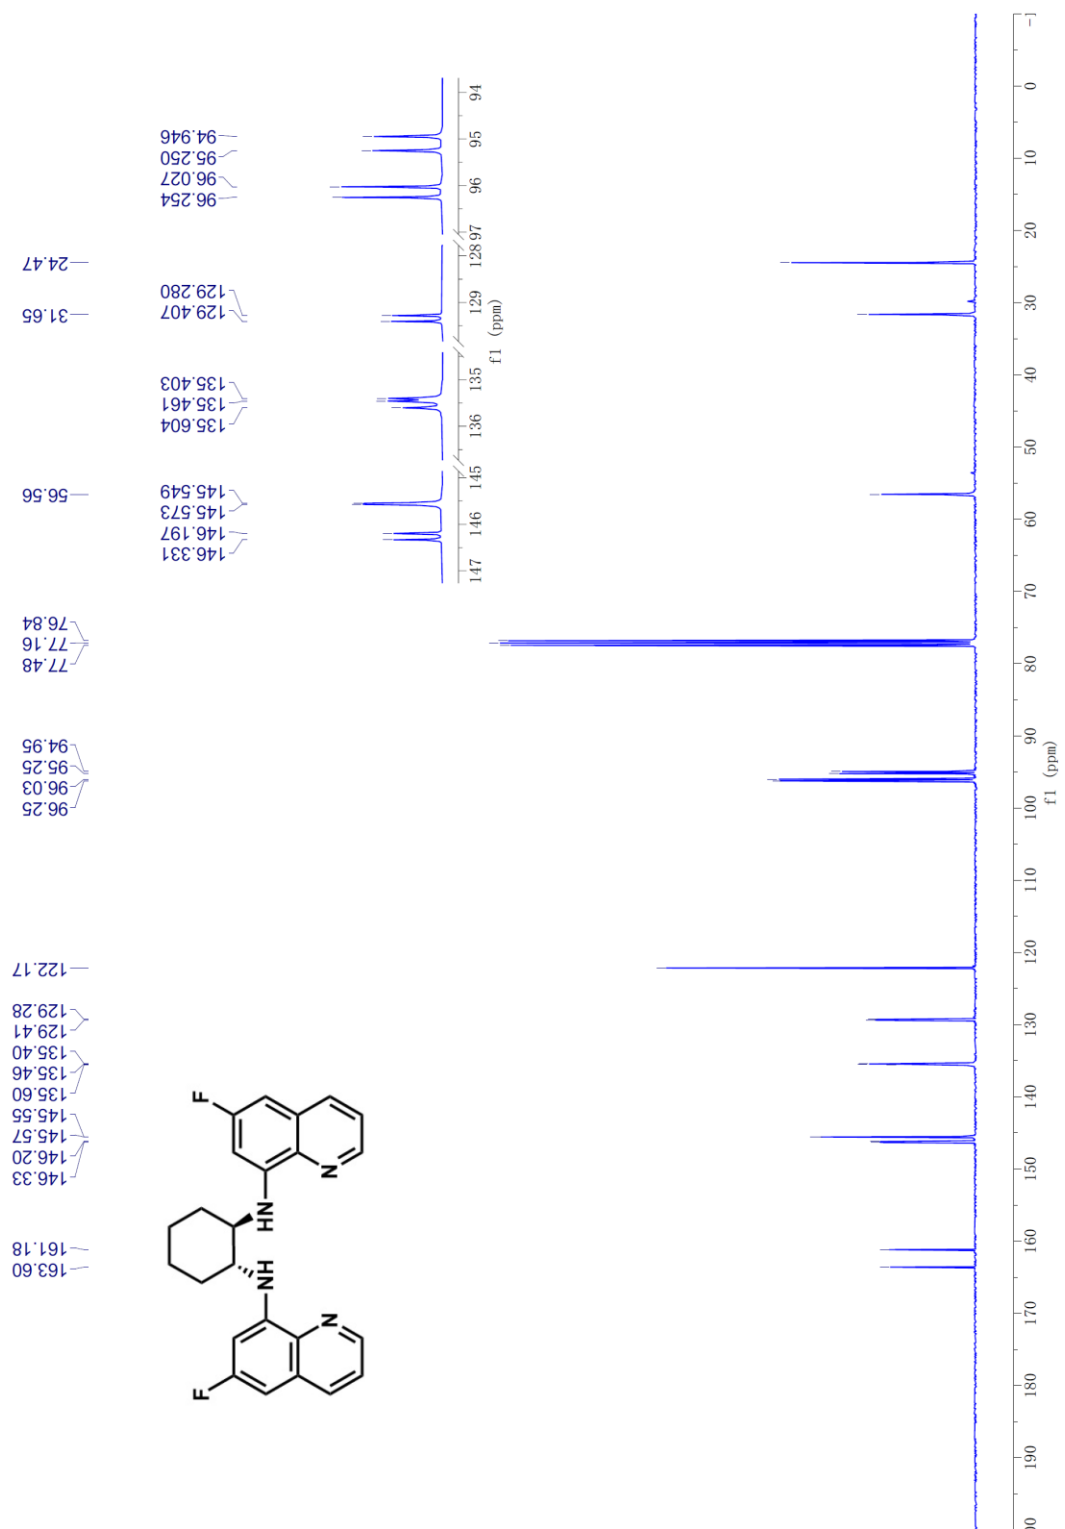

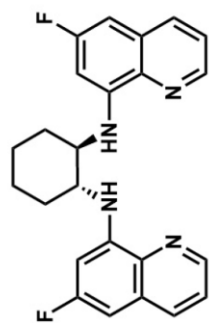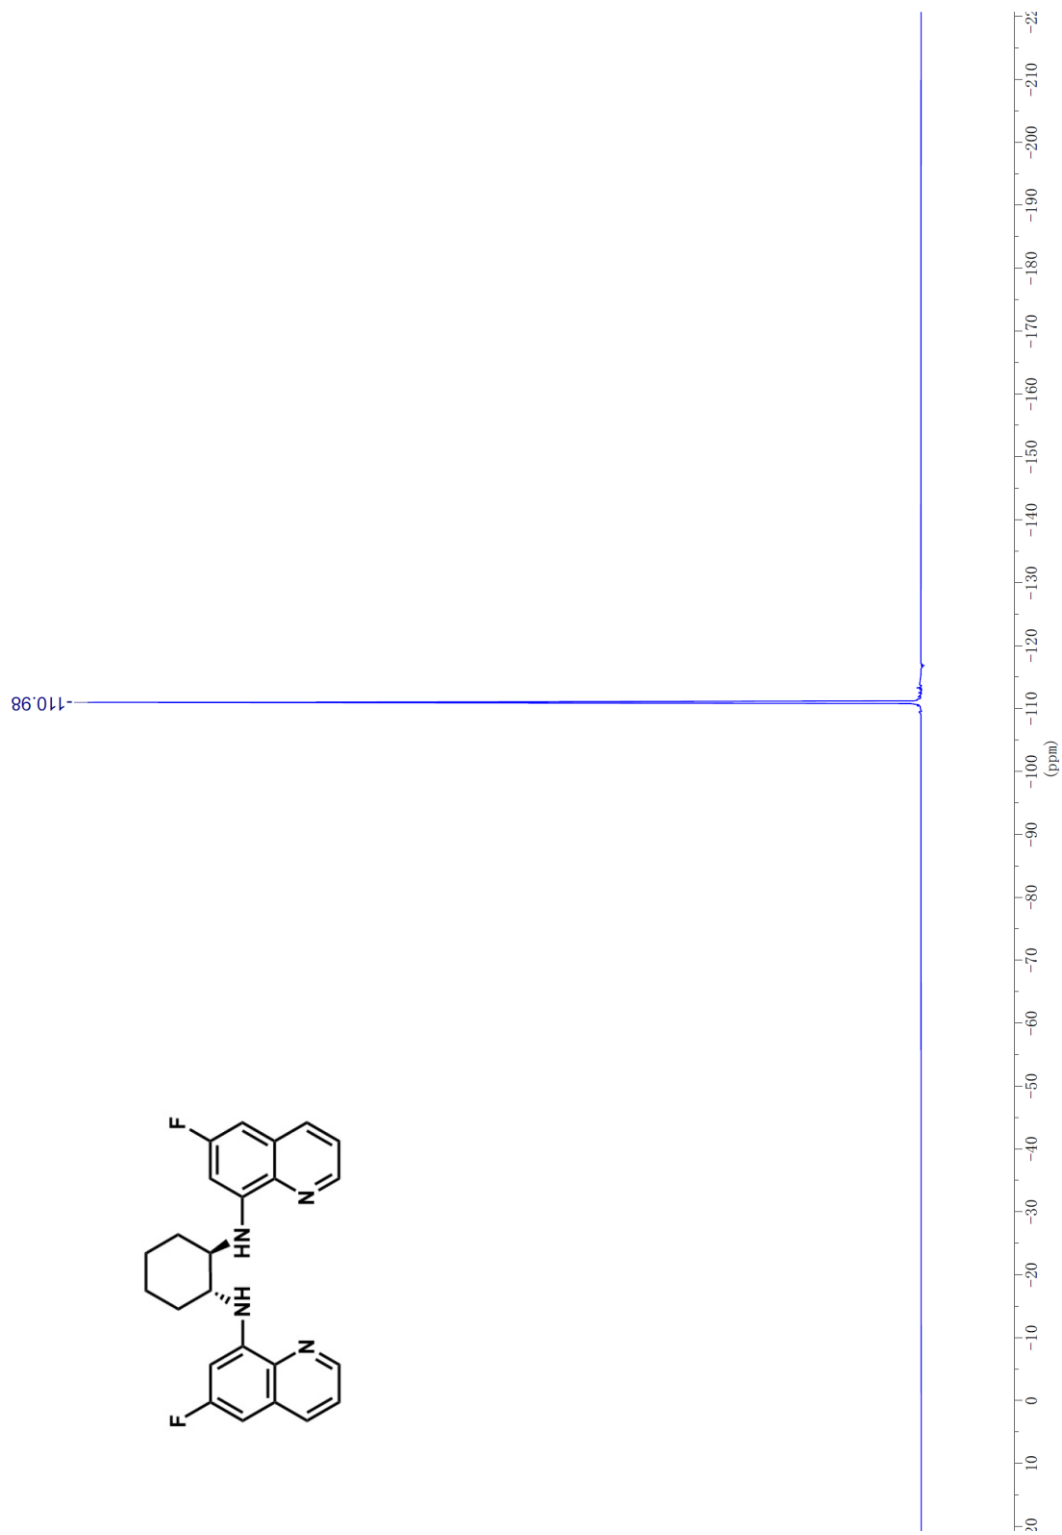

$^{19}\text{F}$  NMR of L2

# <sup>1</sup>H NMR of L3

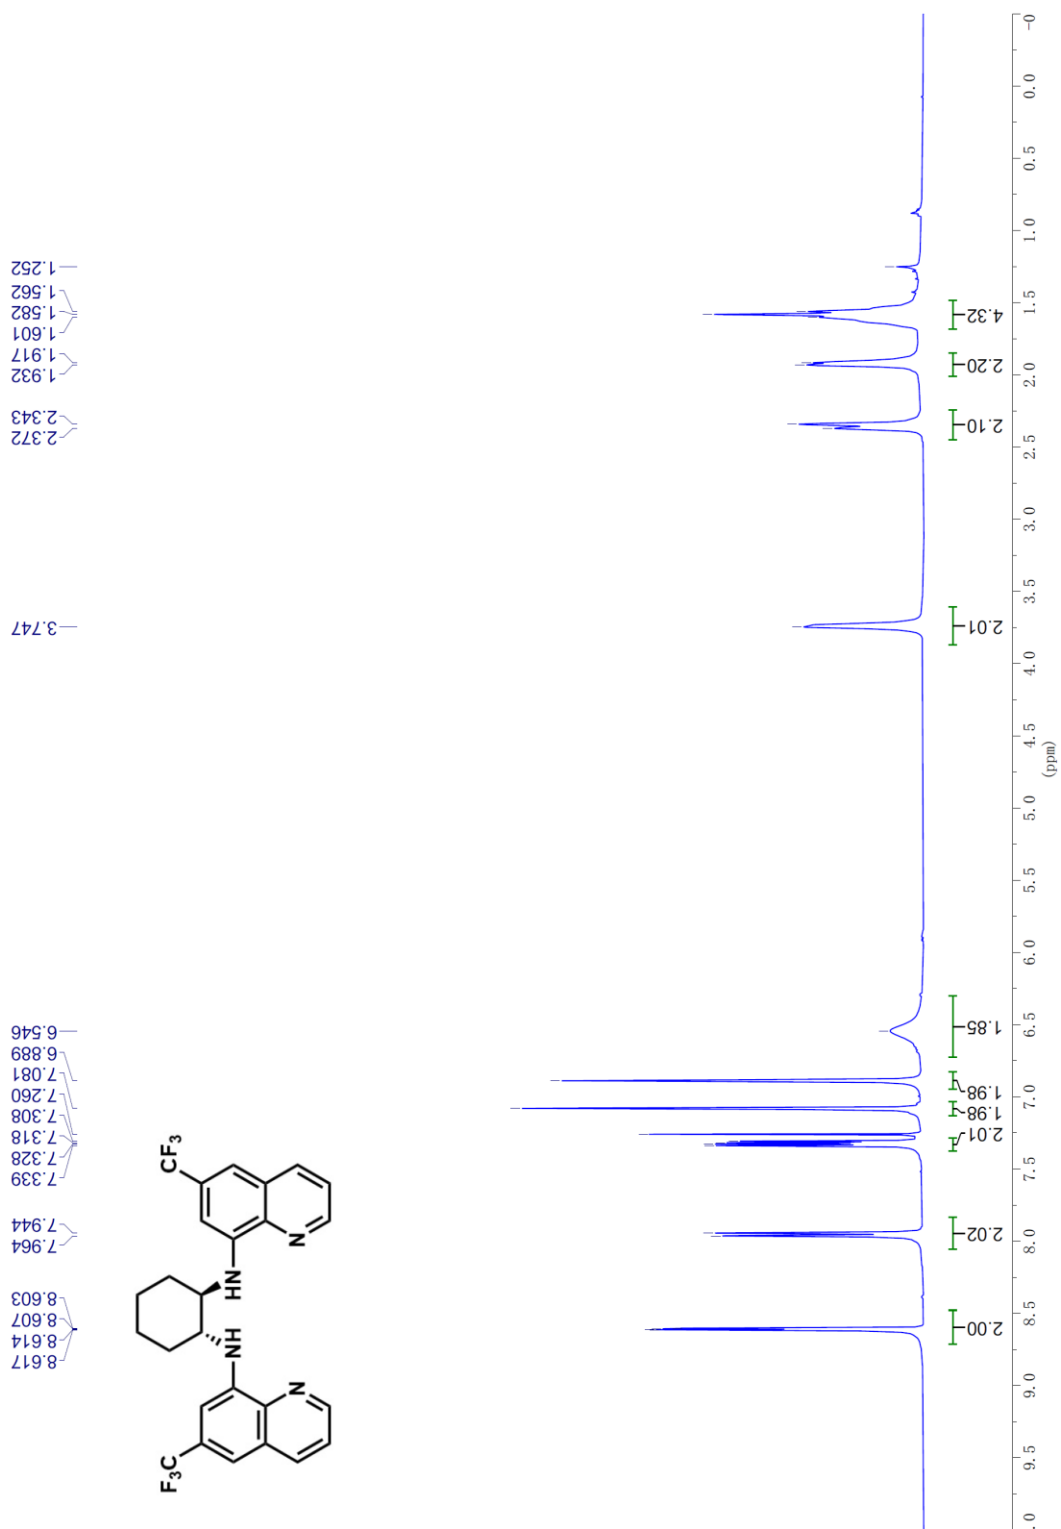

# <sup>13</sup>C NMR of L3

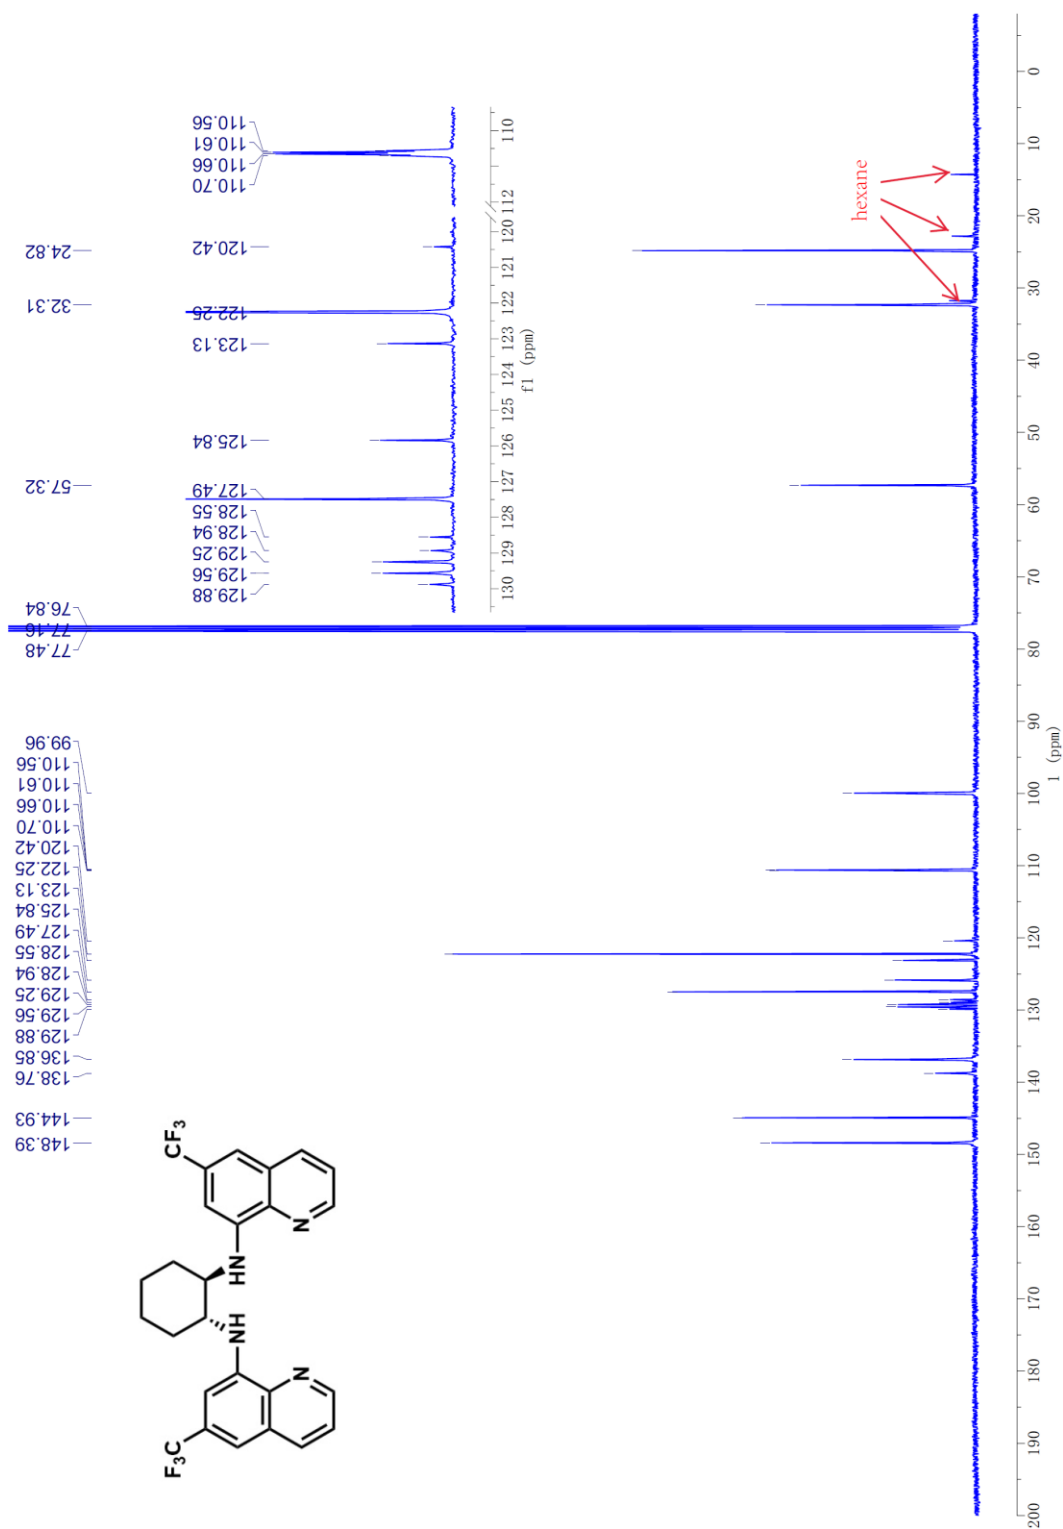

—62.83

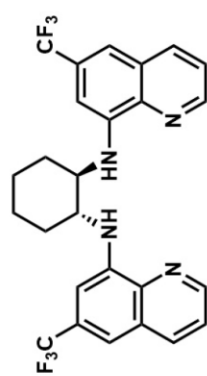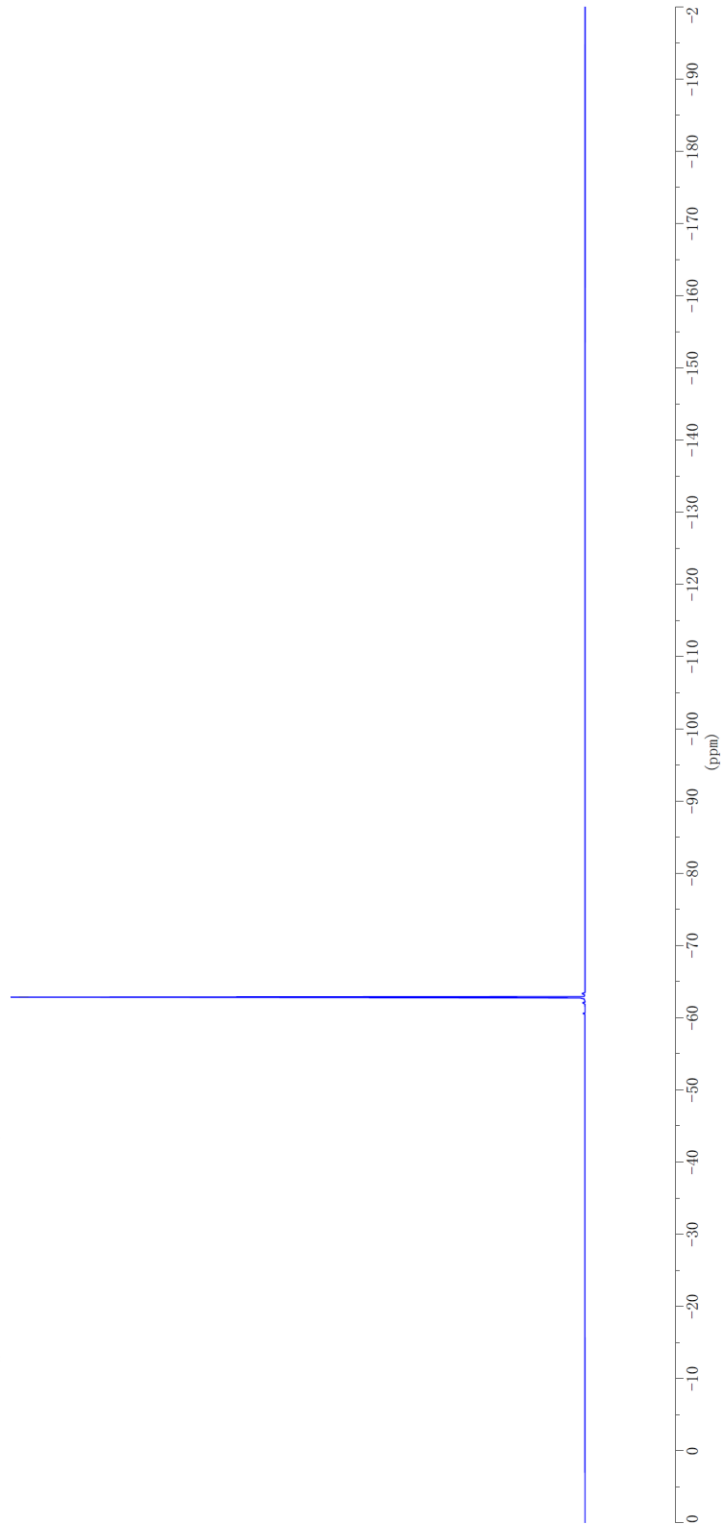

**<sup>19</sup>F NMR of L3**

# <sup>1</sup>H NMR of L4

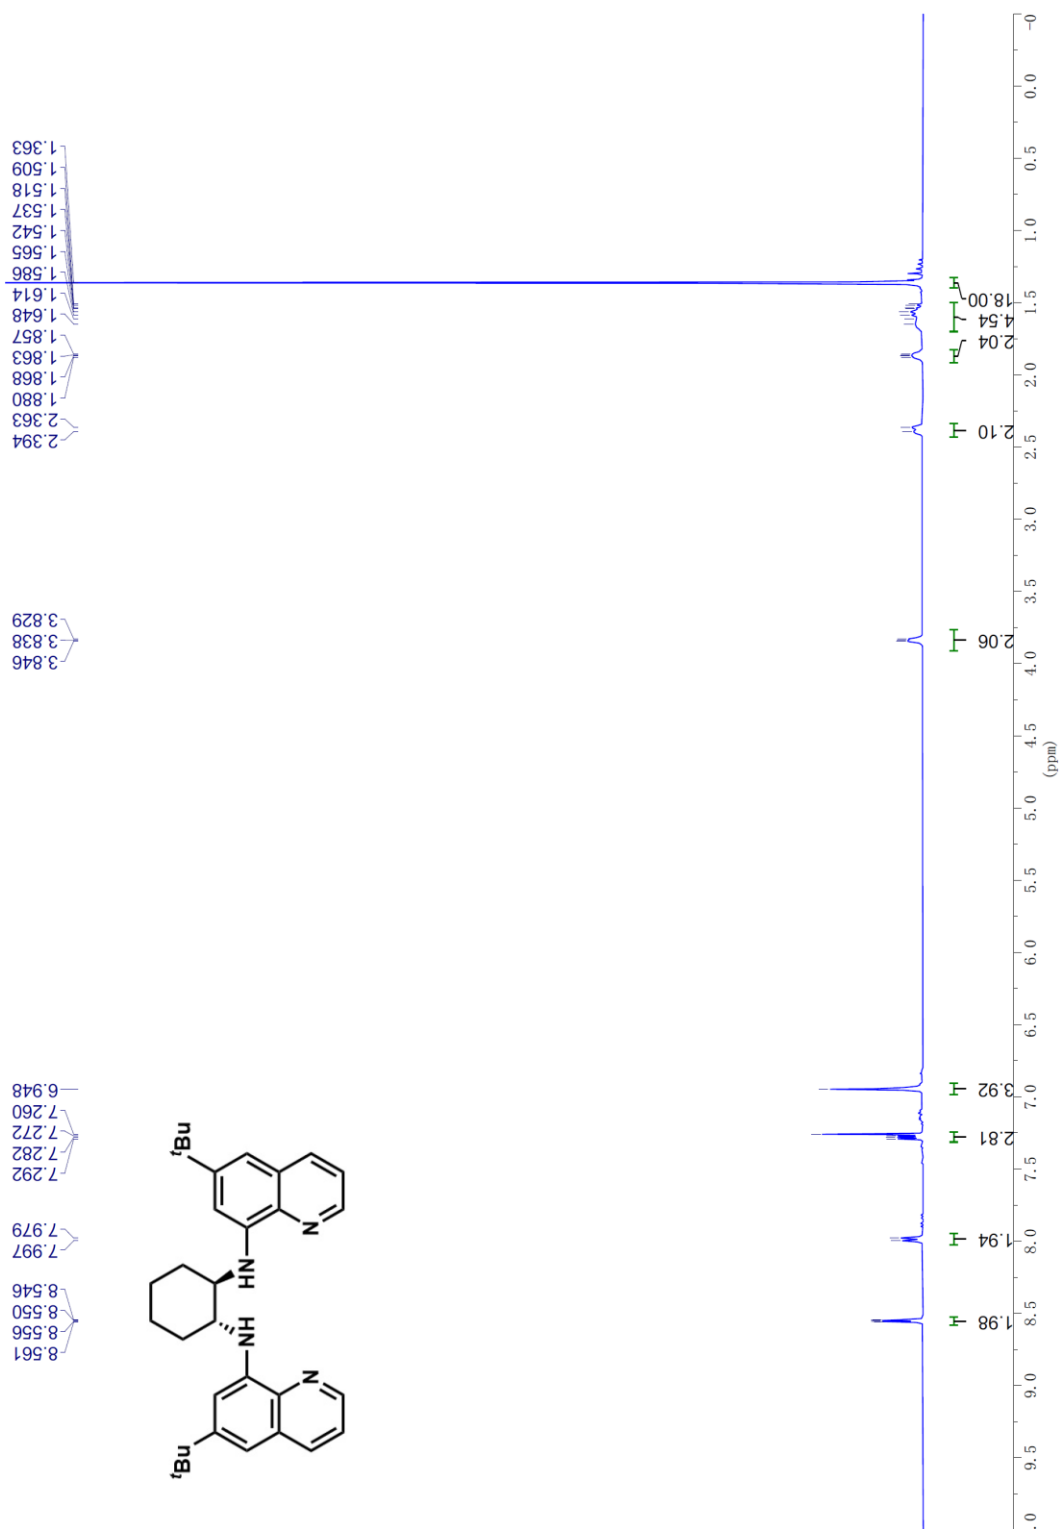



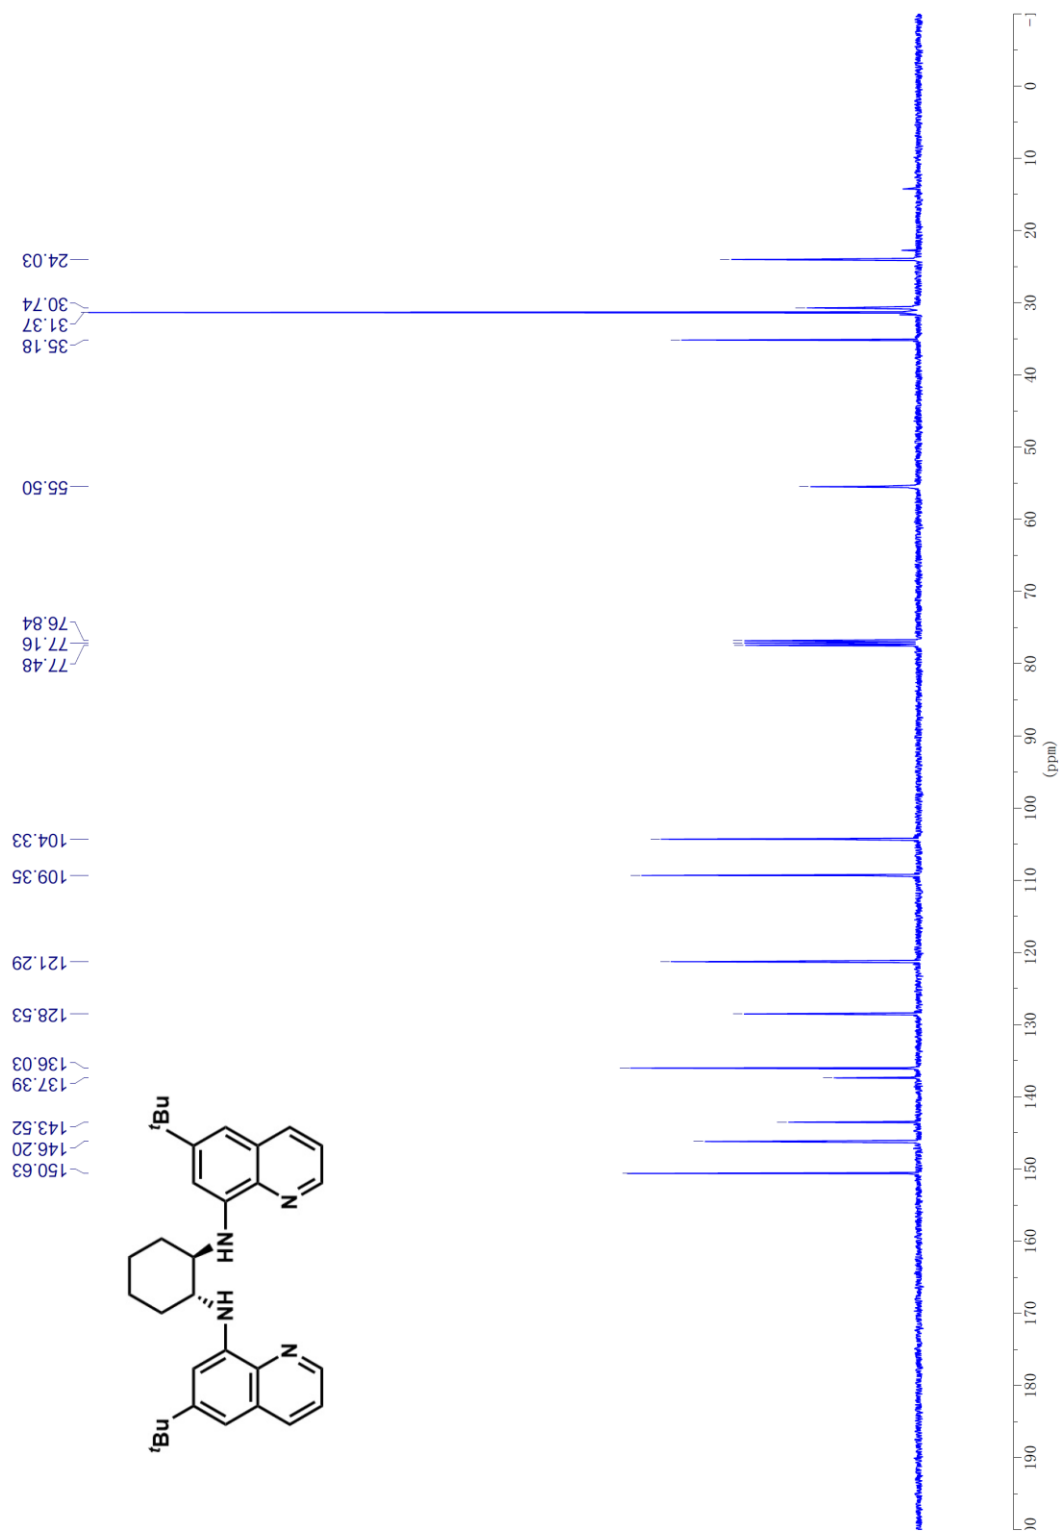

# <sup>1</sup>H NMR of L5

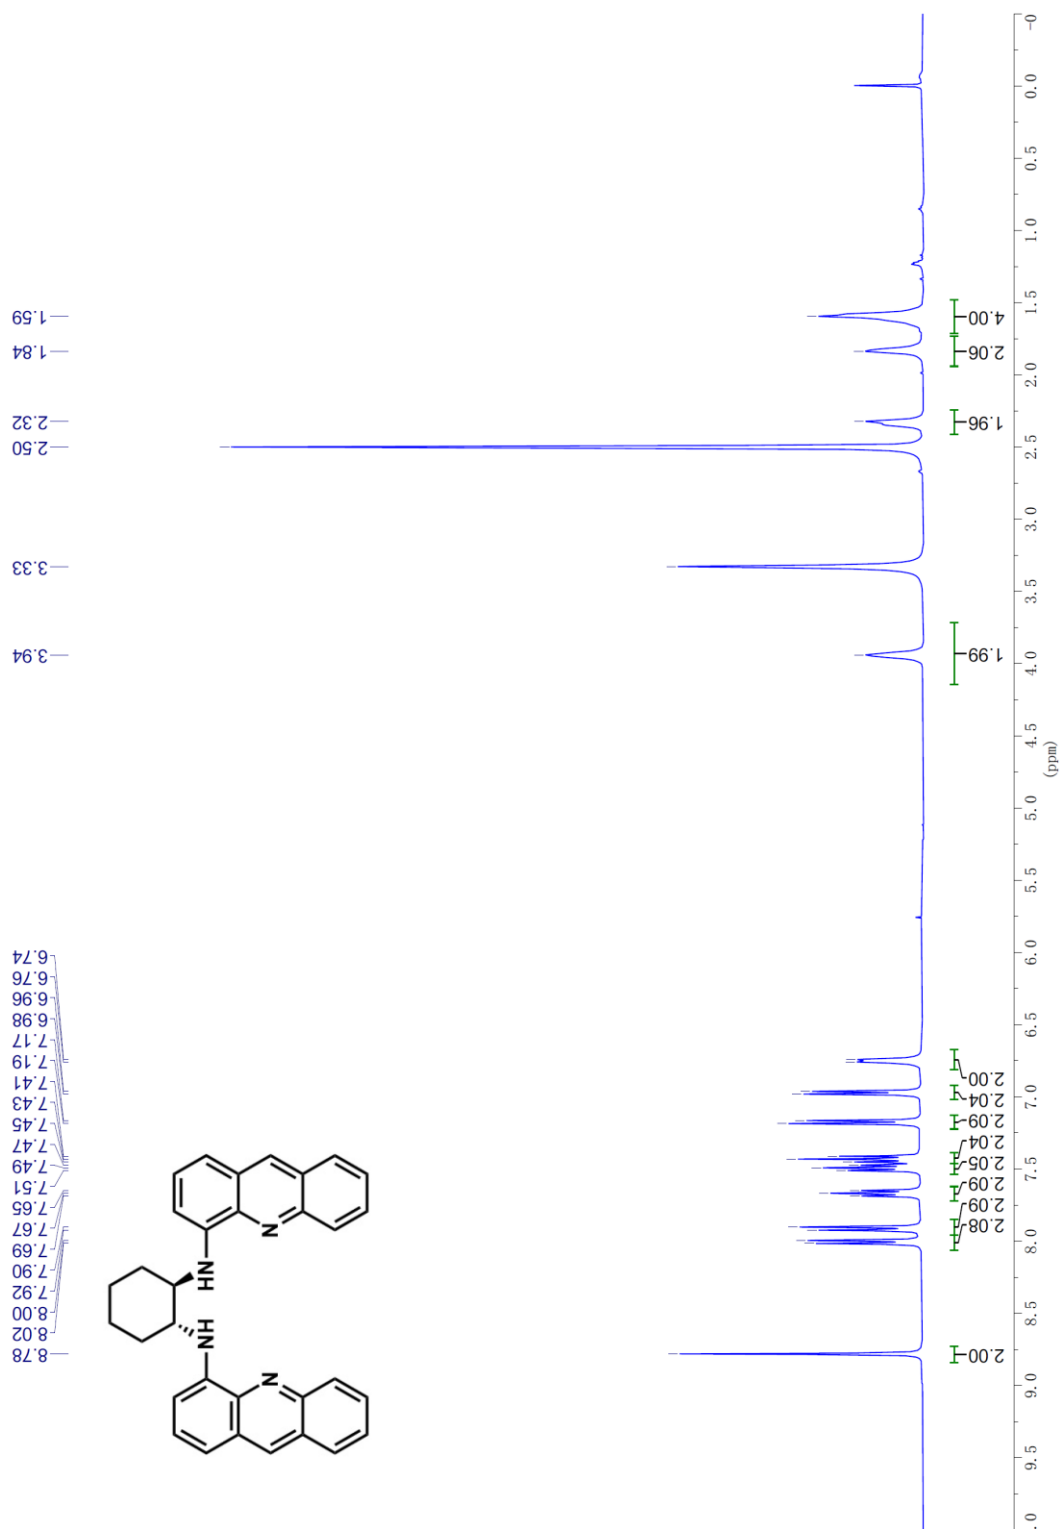

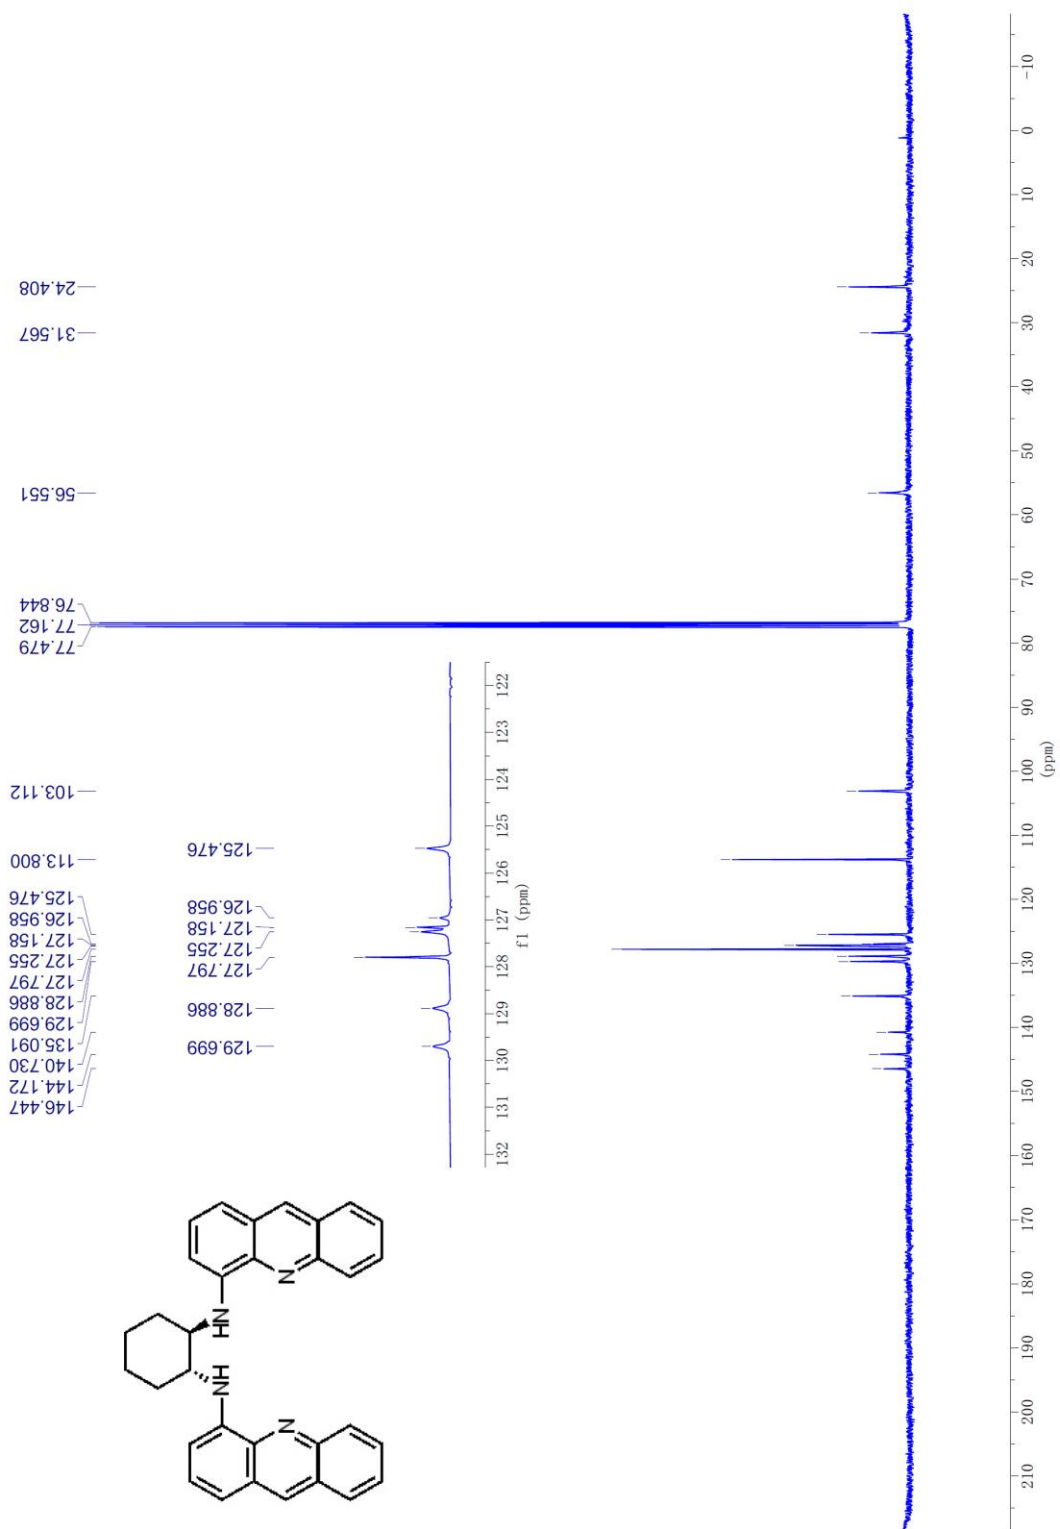

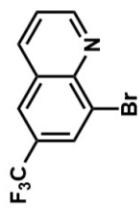

9.172  
9.168  
9.162  
9.157  
8.296  
8.291  
8.275  
8.271  
8.245  
8.240  
8.129  
8.127  
7.613  
7.603  
7.592  
7.582  
7.260

1.643

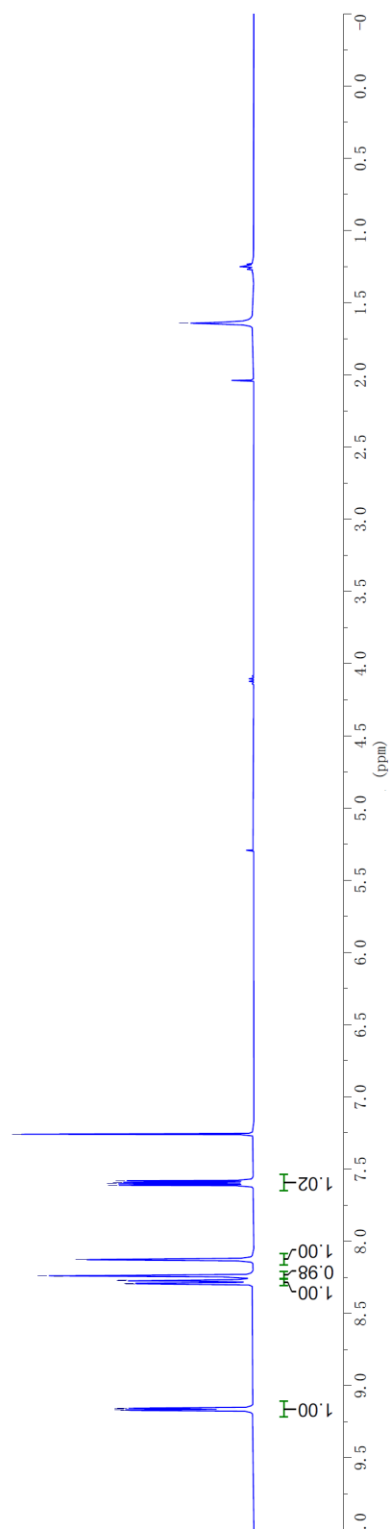

<sup>1</sup>H NMR of 4c

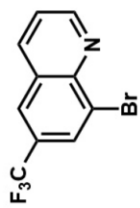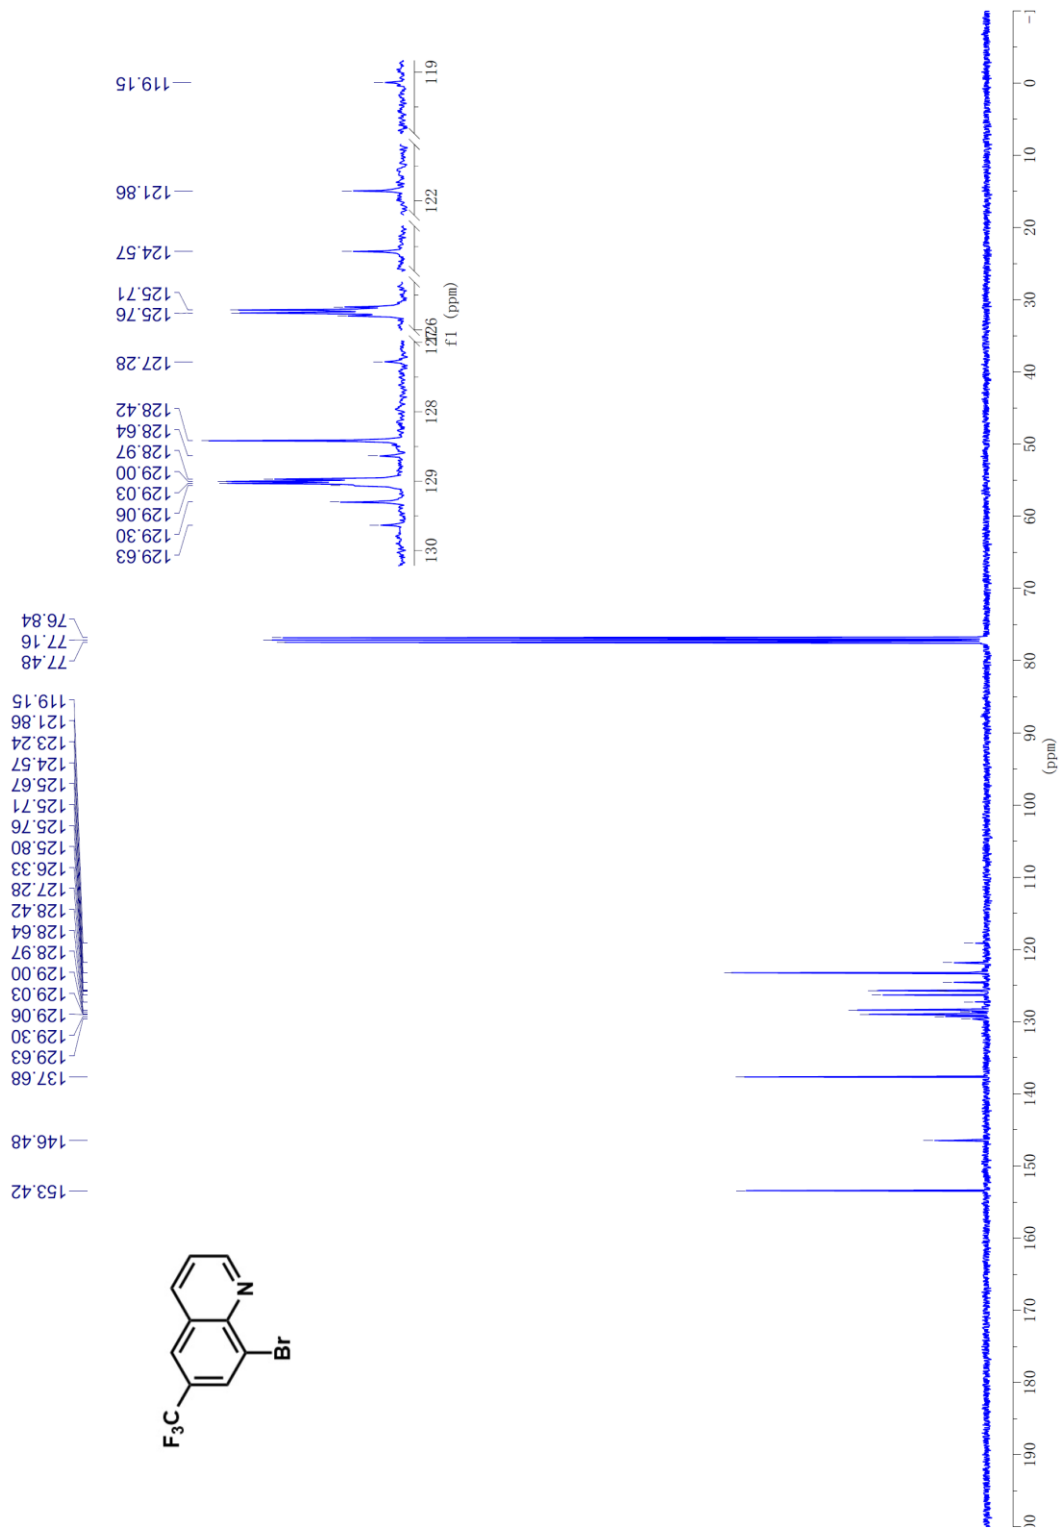

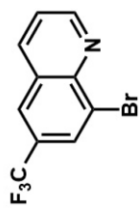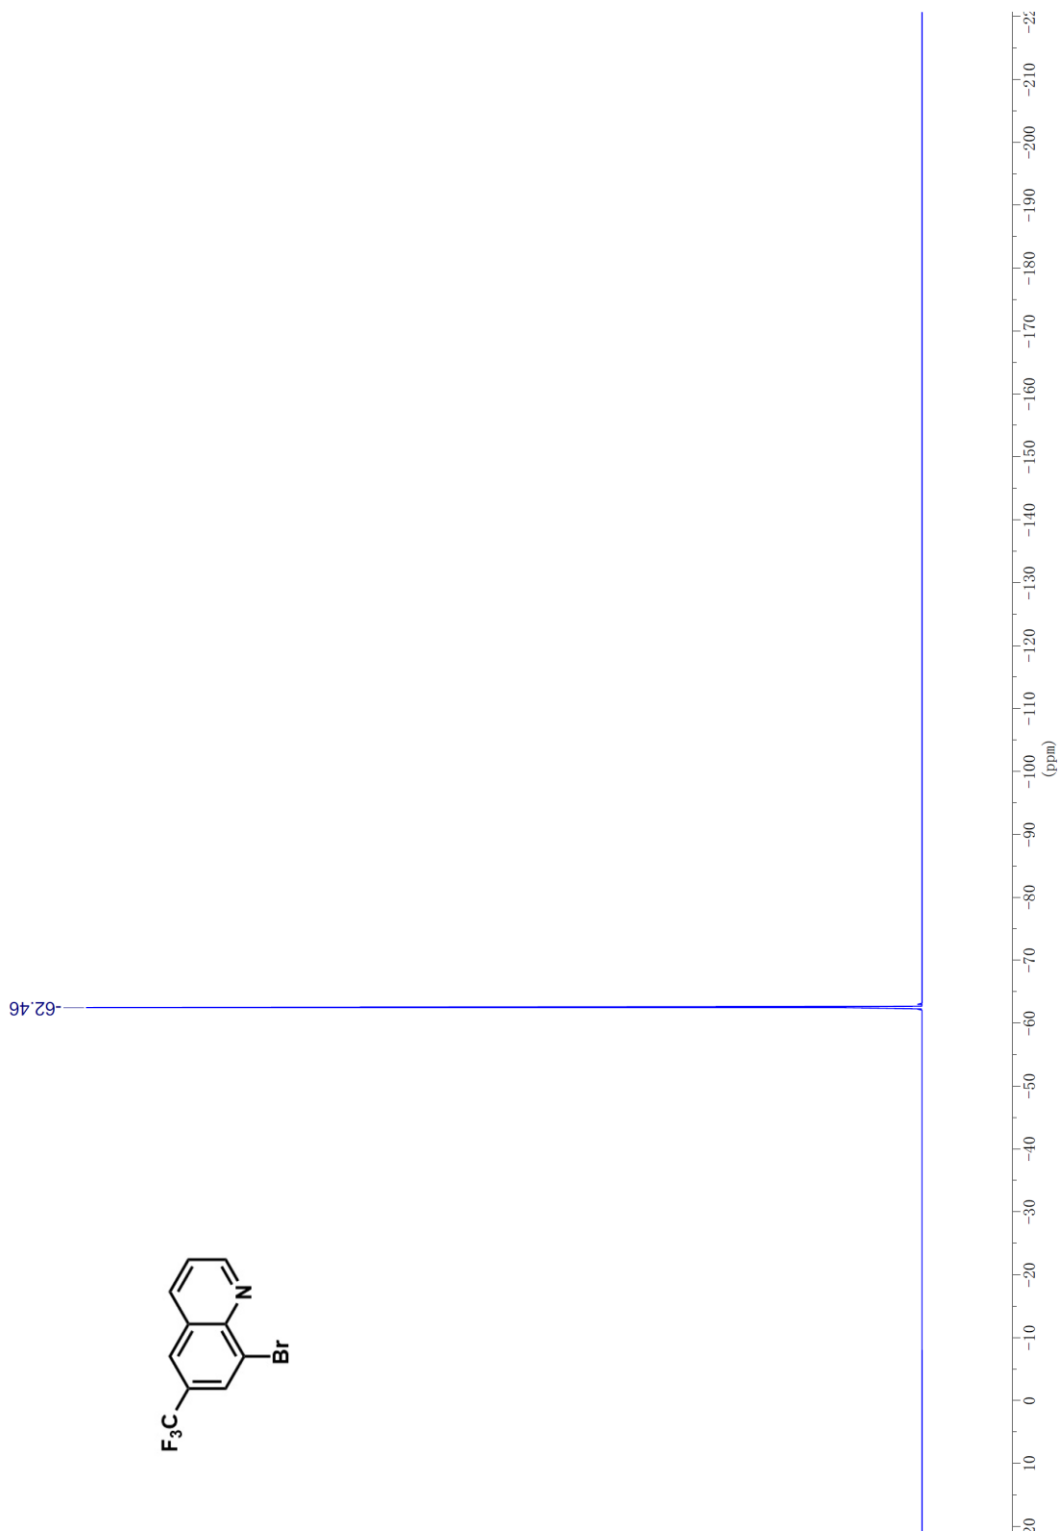

<sup>19</sup>F NMR of **4c**

8.715  
8.471  
8.468  
8.453  
8.450  
8.403  
8.381  
8.033  
8.011  
8.006  
8.004  
7.983  
7.847  
7.844  
7.830  
7.827  
7.822  
7.808  
7.805  
7.595  
7.577  
7.558  
7.260  
7.244  
7.241  
7.223

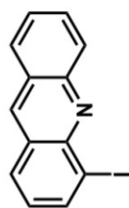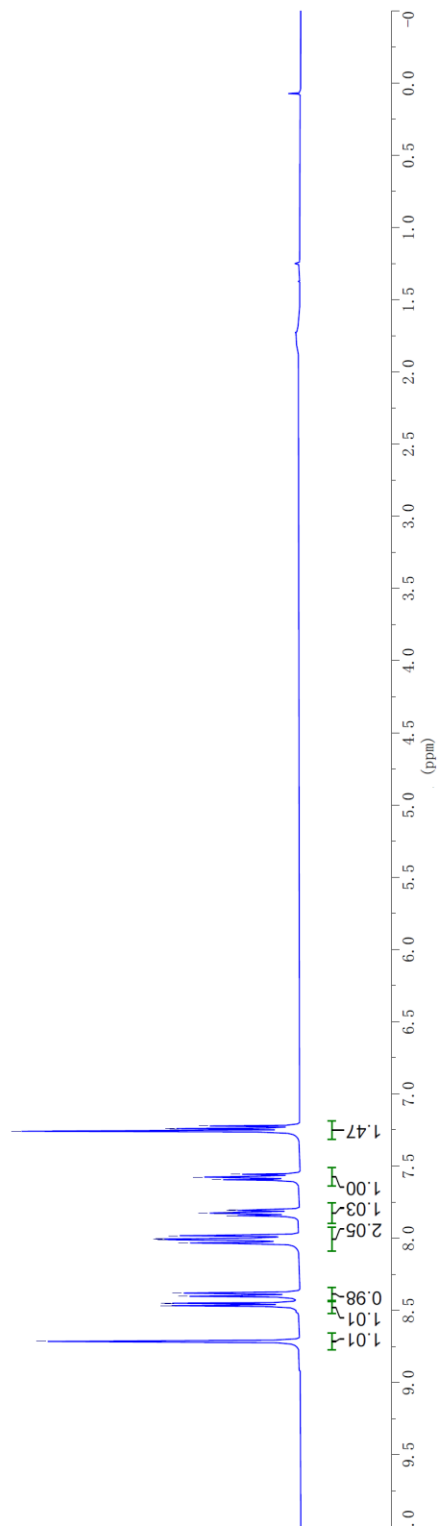

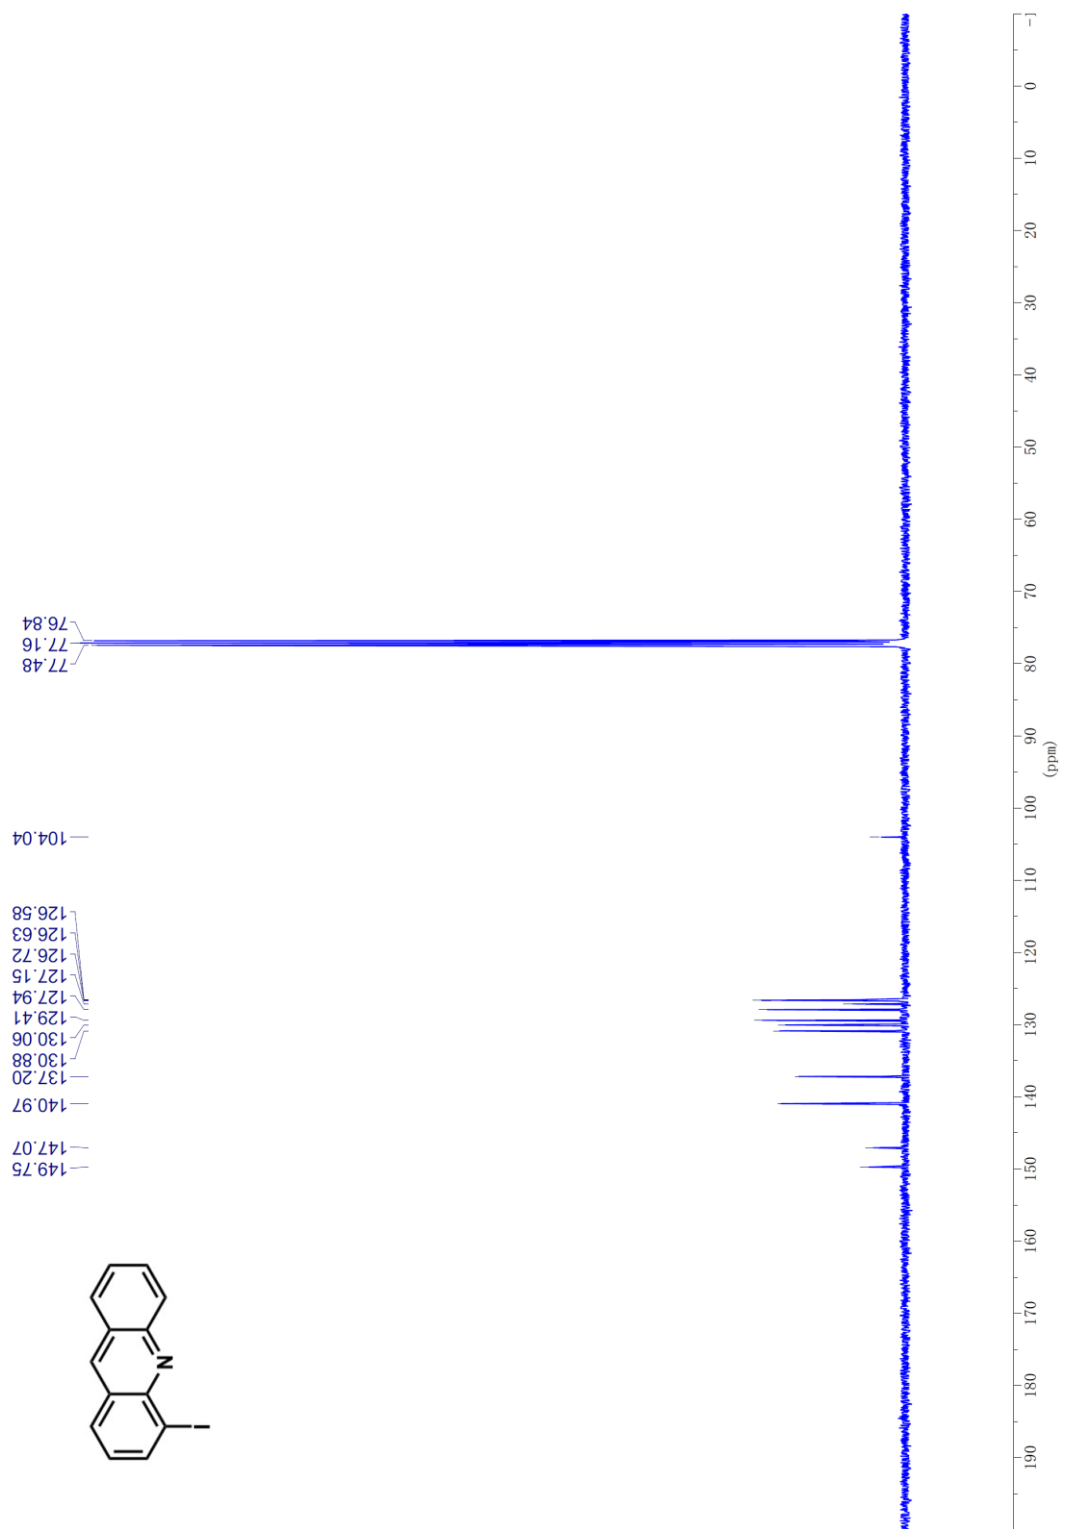



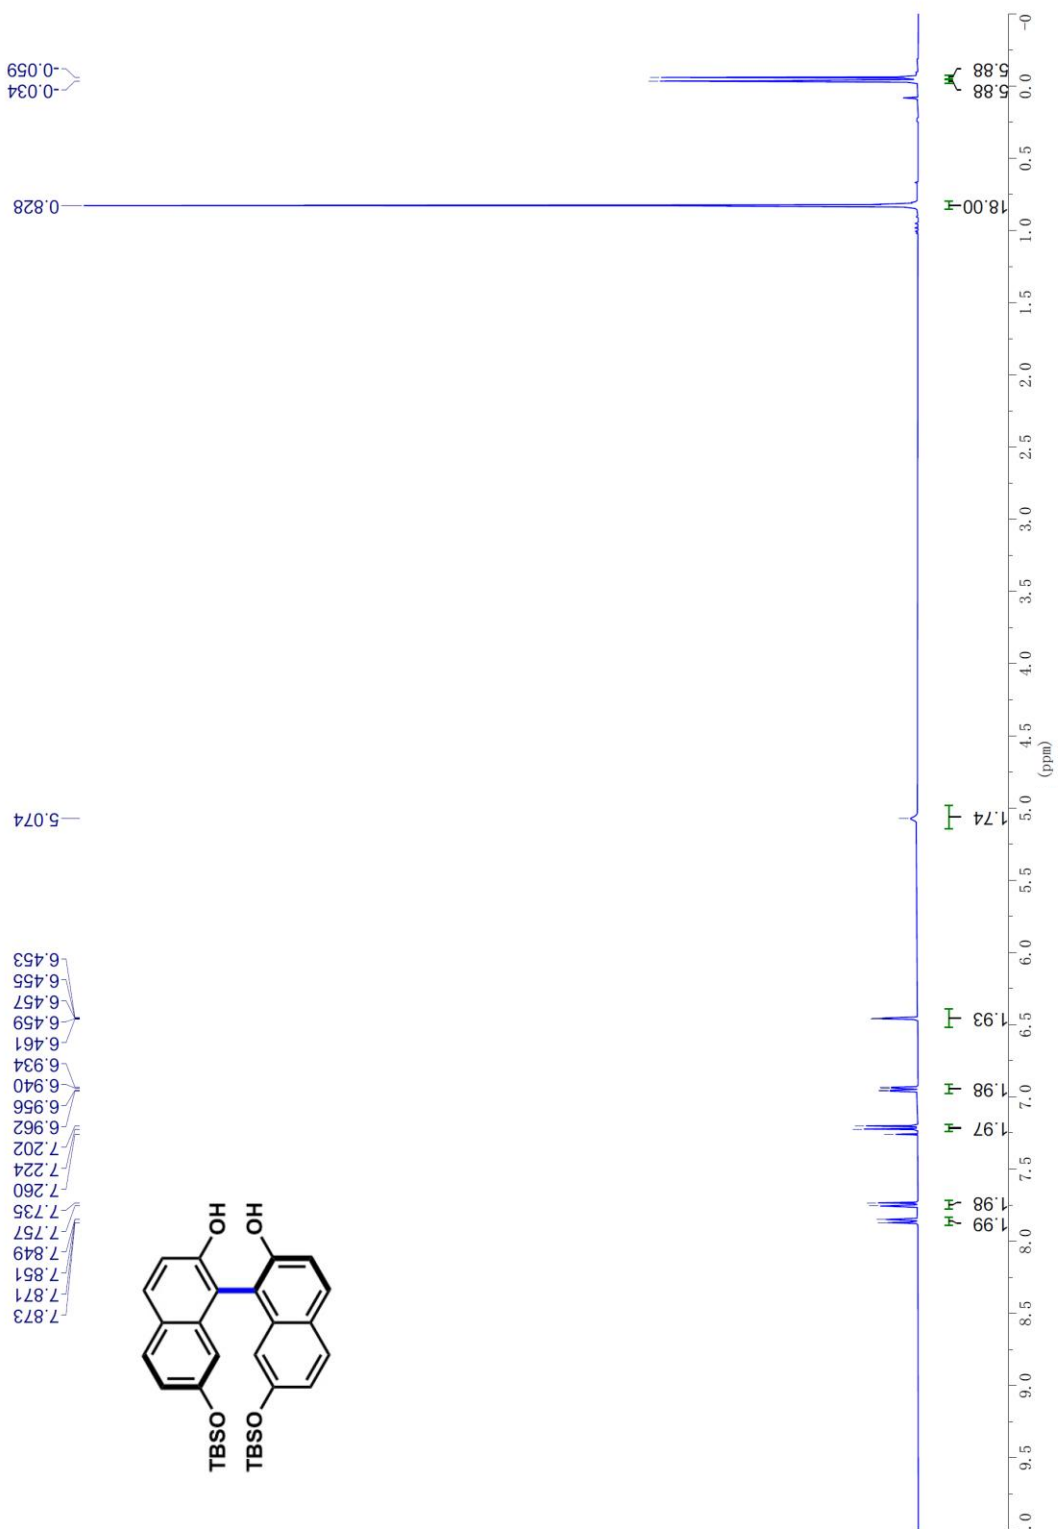

<sup>13</sup>C NMR of **2n**

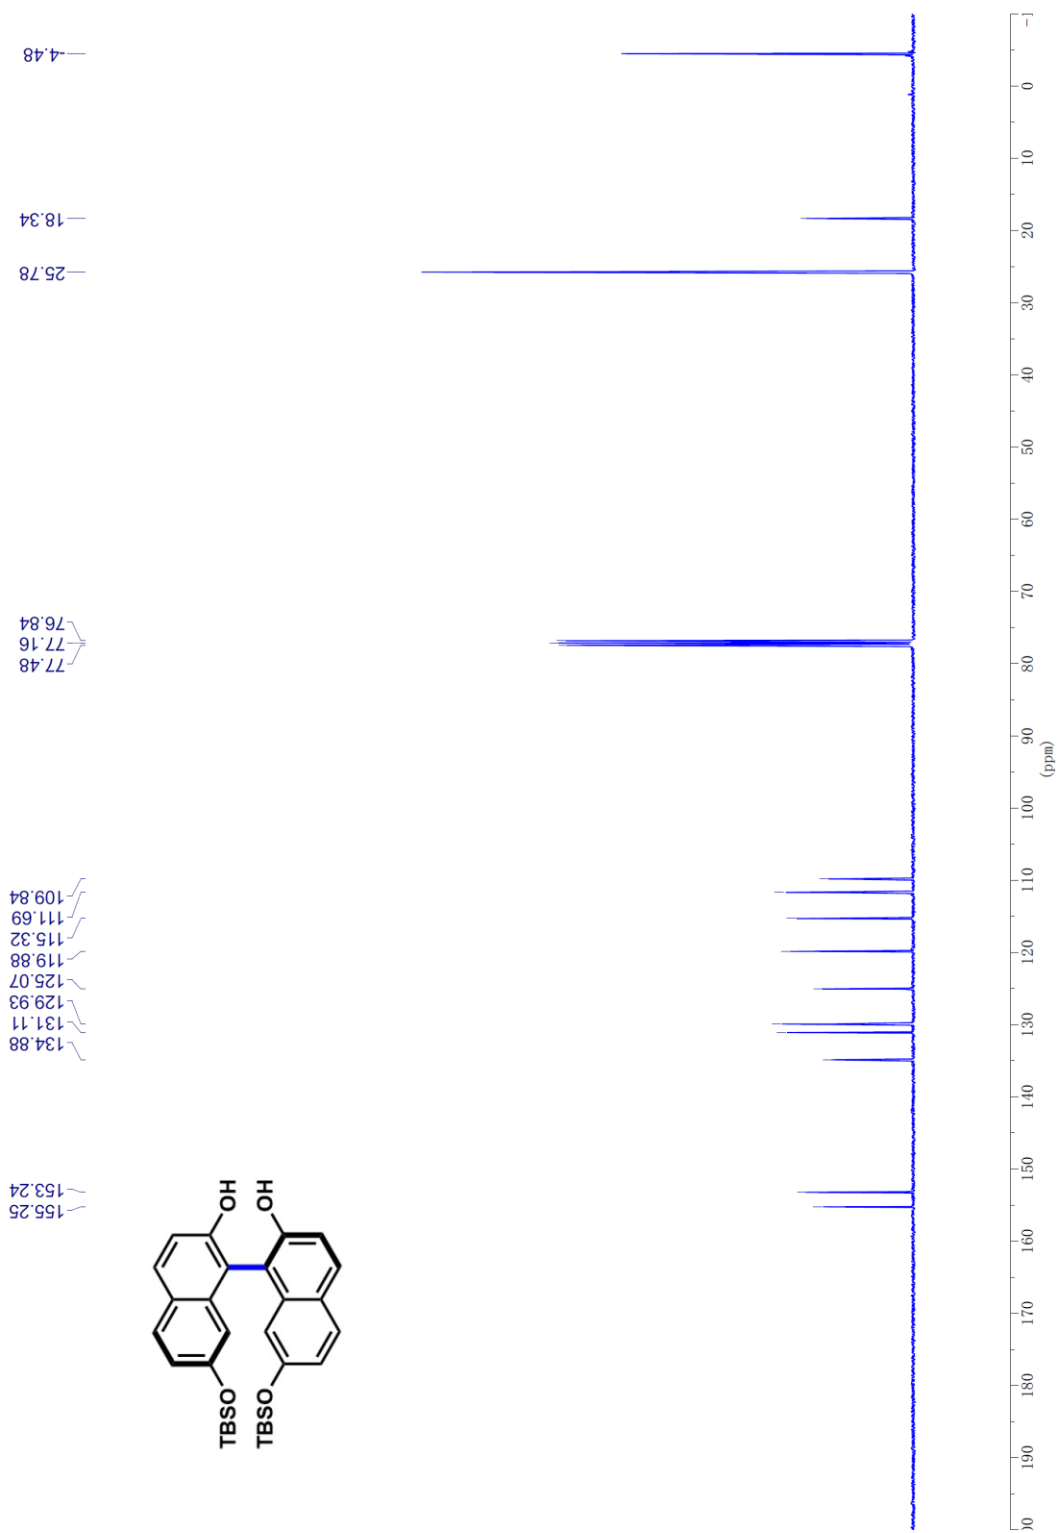

# Copies of HPLC Spectrum

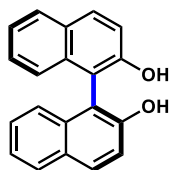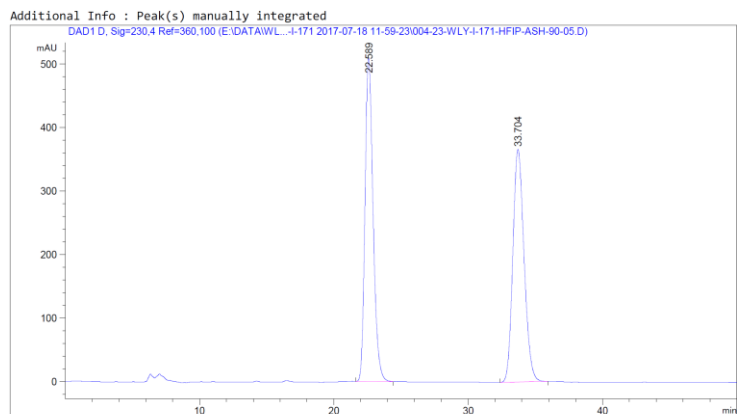

=====  
 Area Percent Report  
 =====

Sorted By : Signal  
 Multiplier : 1.0000  
 Dilution : 1.0000  
 Use Multiplier & Dilution Factor with ISTDs

Signal 1: DAD1 D, Sig=230,4 Ref=360,100

| Peak # | RetTime [min] | Type | Width [min] | Area [mAU*s] | Height [mAU] | Area %  |
|--------|---------------|------|-------------|--------------|--------------|---------|
| 1      | 22.589        | BB   | 0.6379      | 2.13227e4    | 508.31418    | 50.0704 |
| 2      | 33.704        | BB   | 0.8048      | 2.12627e4    | 366.27551    | 49.9296 |

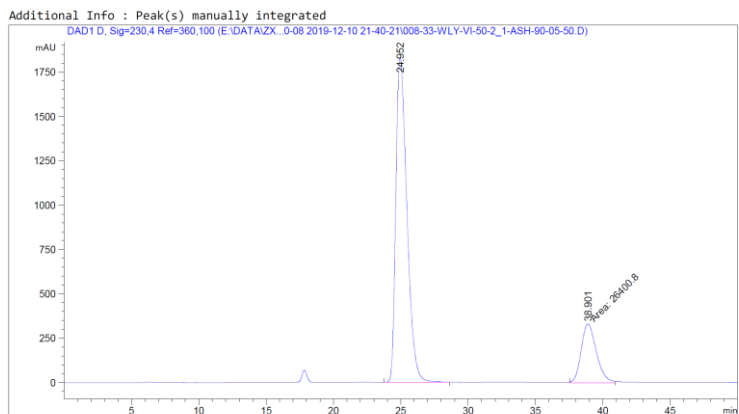

=====  
 Area Percent Report  
 =====

Sorted By : Signal  
 Multiplier : 1.0000  
 Dilution : 1.0000  
 Use Multiplier & Dilution Factor with ISTDs

Signal 1: DAD1 D, Sig=230,4 Ref=360,100

| Peak # | RetTime [min] | Type | Width [min] | Area [mAU*s] | Height [mAU] | Area %  |
|--------|---------------|------|-------------|--------------|--------------|---------|
| 1      | 24.952        | BB   | 0.6798      | 1.04650e5    | 1825.58789   | 79.8546 |
| 2      | 38.901        | MM   | 1.3212      | 2.64008e4    | 333.04184    | 20.1454 |

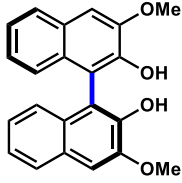

Additional Info : Peak(s) manually integrated

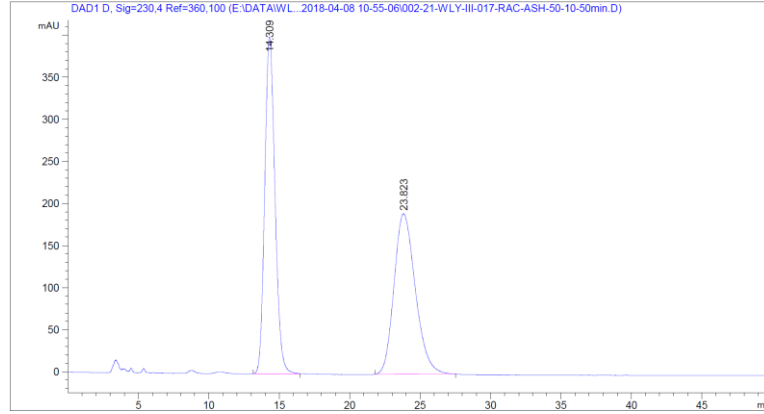

Area Percent Report

Sorted By : Signal  
Multiplier : 1.0000  
Dilution : 1.0000  
Use Multiplier & Dilution Factor with ISTDs

Signal 1: DAD1 D, Sig=230,4 Ref=360,100

| Peak # | RetTime [min] | Type | Width [min] | Area [mAU*s] | Height [mAU] | Area %  |
|--------|---------------|------|-------------|--------------|--------------|---------|
| 1      | 14.309        | BB   | 0.7439      | 2.02275e4    | 400.07605    | 50.2202 |
| 2      | 23.823        | BB   | 1.2303      | 2.00501e4    | 190.74997    | 49.7798 |

Additional Info : Peak(s) manually integrated

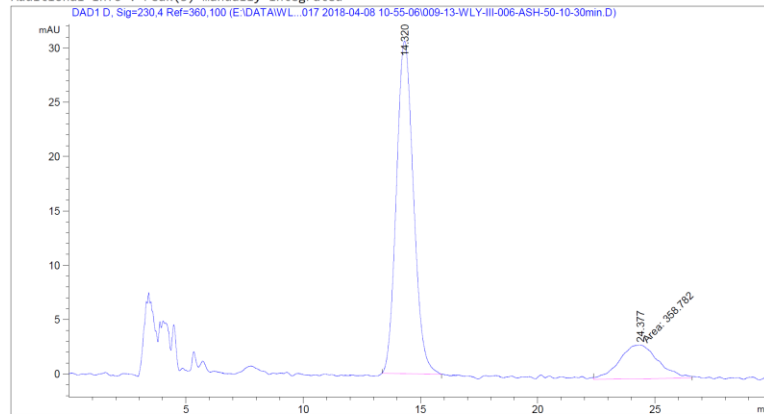

Area Percent Report

Sorted By : Signal  
Multiplier : 1.0000  
Dilution : 1.0000  
Use Multiplier & Dilution Factor with ISTDs

Signal 1: DAD1 D, Sig=230,4 Ref=360,100

| Peak # | RetTime [min] | Type | Width [min] | Area [mAU*s] | Height [mAU] | Area %  |
|--------|---------------|------|-------------|--------------|--------------|---------|
| 1      | 14.320        | BB   | 0.5945      | 1552.13379   | 30.61634     | 81.2246 |
| 2      | 24.377        | MM   | 1.9152      | 358.78198    | 3.12225      | 18.7754 |

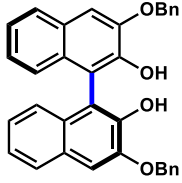

Additional Info : Peak(s) manually integrated

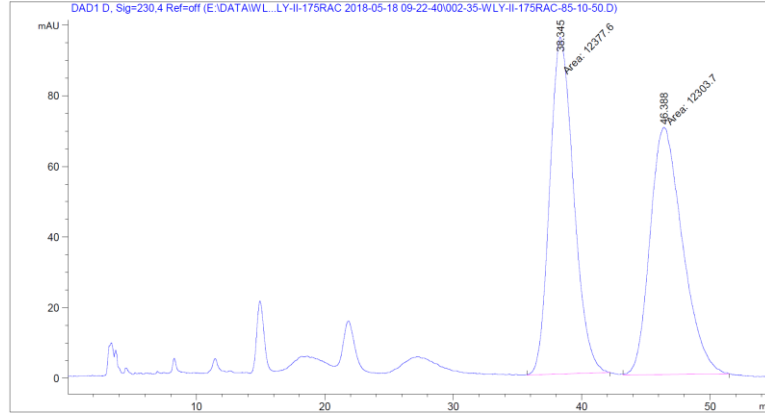

Area Percent Report

Sorted By : Signal  
Multiplier : 1.0000  
Dilution : 1.0000  
Use Multiplier & Dilution Factor with ISTDs

Signal 1: DAD1 D, Sig=230,4 Ref=off

| Peak # | RetTime [min] | Type | Width [min] | Area [mAU*s] | Height [mAU] | Area %  |
|--------|---------------|------|-------------|--------------|--------------|---------|
| 1      | 38.345        | MM   | 2.1614      | 1.23776e4    | 95.44270     | 50.1498 |
| 2      | 46.388        | MM   | 2.9294      | 1.23037e4    | 70.00010     | 49.8502 |

Additional Info : Peak(s) manually integrated

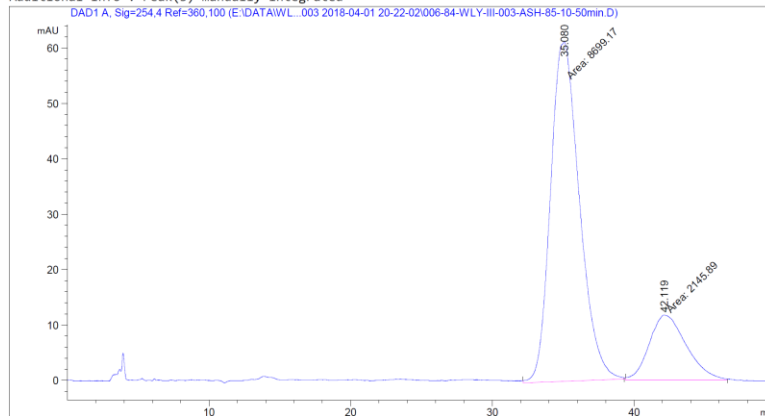

Area Percent Report

Sorted By : Signal  
Multiplier : 1.0000  
Dilution : 1.0000  
Use Multiplier & Dilution Factor with ISTDs

Signal 1: DAD1 A, Sig=254,4 Ref=360,100

| Peak # | RetTime [min] | Type | Width [min] | Area [mAU*s] | Height [mAU] | Area %  |
|--------|---------------|------|-------------|--------------|--------------|---------|
| 1      | 35.080        | MM   | 2.3651      | 8699.16504   | 61.30151     | 80.2132 |
| 2      | 42.119        | MM   | 3.0356      | 2145.89233   | 11.78163     | 19.7868 |

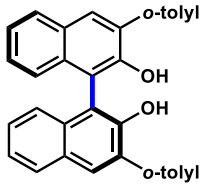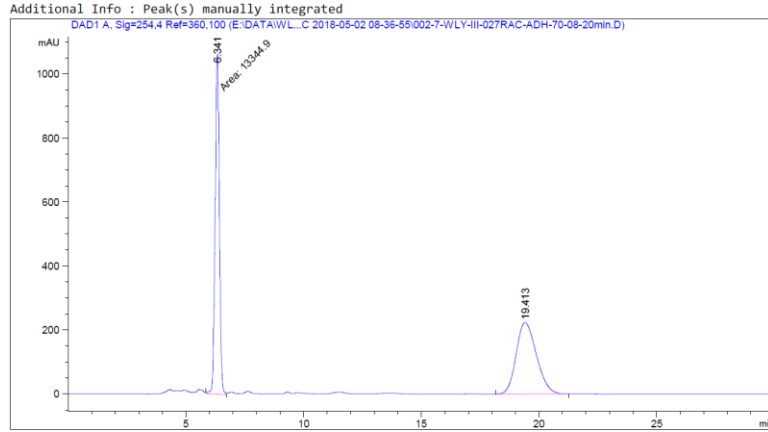

=====  
 Area Percent Report  
 =====

Sorted By : Signal  
 Multiplier : 1.0000  
 Dilution : 1.0000  
 Use Multiplier & Dilution Factor with ISTDs

Signal 1: DAD1 A, Sig=254,4 Ref=360,100

| Peak # | RetTime [min] | Type | Width [min] | Area [mAU*s] | Height [mAU] | Area %  |
|--------|---------------|------|-------------|--------------|--------------|---------|
| 1      | 6.341         | MM   | 0.2090      | 1.33449e4    | 1064.25916   | 49.9964 |
| 2      | 19.413        | BB   | 0.7036      | 1.33469e4    | 223.53136    | 50.0036 |

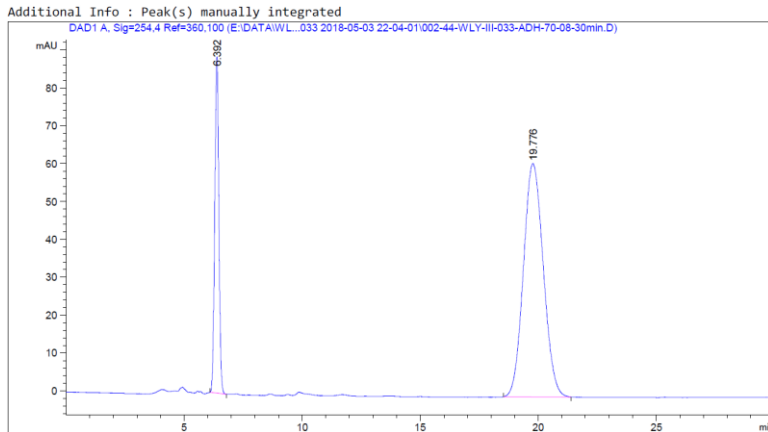

=====  
 Area Percent Report  
 =====

Sorted By : Signal  
 Multiplier : 1.0000  
 Dilution : 1.0000  
 Use Multiplier & Dilution Factor with ISTDs

Signal 1: DAD1 A, Sig=254,4 Ref=360,100

| Peak # | RetTime [min] | Type | Width [min] | Area [mAU*s] | Height [mAU] | Area %  |
|--------|---------------|------|-------------|--------------|--------------|---------|
| 1      | 6.392         | BB   | 0.1840      | 1069.56543   | 88.81834     | 22.9080 |
| 2      | 19.776        | BB   | 0.6859      | 3599.39429   | 61.58450     | 77.0920 |

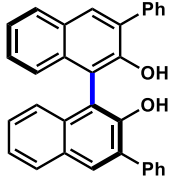

Additional Info : Peak(s) manually integrated

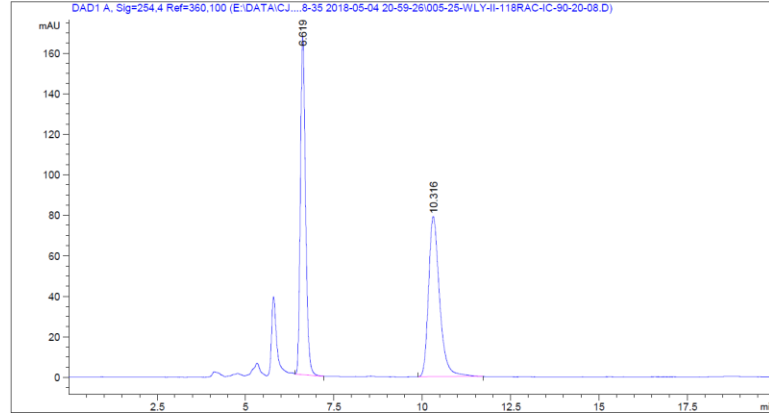

Area Percent Report

Sorted By : Signal  
Multiplier : 1.0000  
Dilution : 1.0000  
Use Multiplier & Dilution Factor with ISTDs

Signal 1: DAD1 A, Sig=254,4 Ref=360,100

| Peak # | RetTime [min] | Type | Width [min] | Area [mAU*s] | Height [mAU] | Area %  |
|--------|---------------|------|-------------|--------------|--------------|---------|
| 1      | 6.619         | BB   | 0.1562      | 1695.65930   | 166.71983    | 49.7278 |
| 2      | 10.316        | BB   | 0.3210      | 1714.22607   | 79.04620     | 50.2722 |

Additional Info : Peak(s) manually integrated

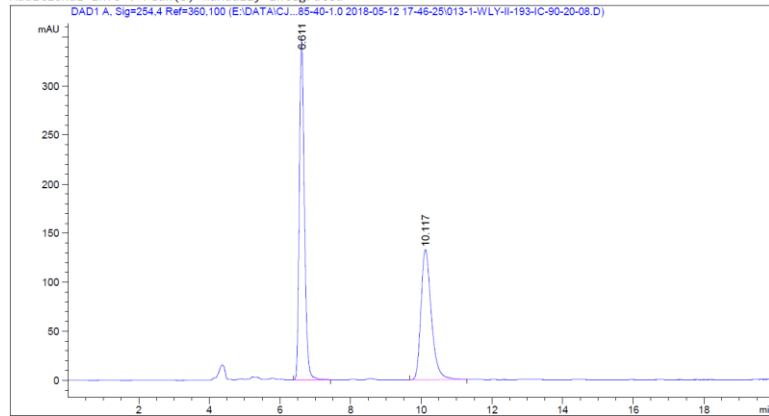

Area Percent Report

Sorted By : Signal  
Multiplier : 1.0000  
Dilution : 1.0000  
Use Multiplier & Dilution Factor with ISTDs

Signal 1: DAD1 A, Sig=254,4 Ref=360,100

| Peak # | RetTime [min] | Type | Width [min] | Area [mAU*s] | Height [mAU] | Area %  |
|--------|---------------|------|-------------|--------------|--------------|---------|
| 1      | 6.611         | BB   | 0.1538      | 3463.72510   | 346.01978    | 56.1755 |
| 2      | 10.117        | BB   | 0.3080      | 2702.16992   | 132.75162    | 43.8245 |

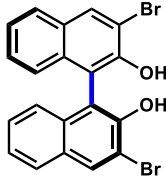

Additional Info : Peak(s) manually integrated

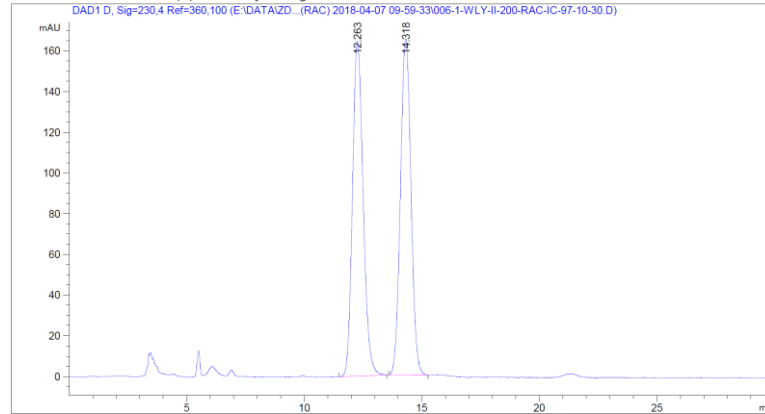

Area Percent Report

Sorted By : Signal  
Multiplier : 1.0000  
Dilution : 1.0000  
Use Multiplier & Dilution Factor with ISTDs

Signal 1: DAD1 D, Sig=230,4 Ref=360,100

| Peak # | RetTime [min] | Type | Width [min] | Area [mAU*s] | Height [mAU] | Area %  |
|--------|---------------|------|-------------|--------------|--------------|---------|
| 1      | 12.263        | BB   | 0.4789      | 5155.60742   | 164.36372    | 50.0762 |
| 2      | 14.318        | BB   | 0.4743      | 5139.91748   | 165.07063    | 49.9238 |

Additional Info : Peak(s) manually integrated

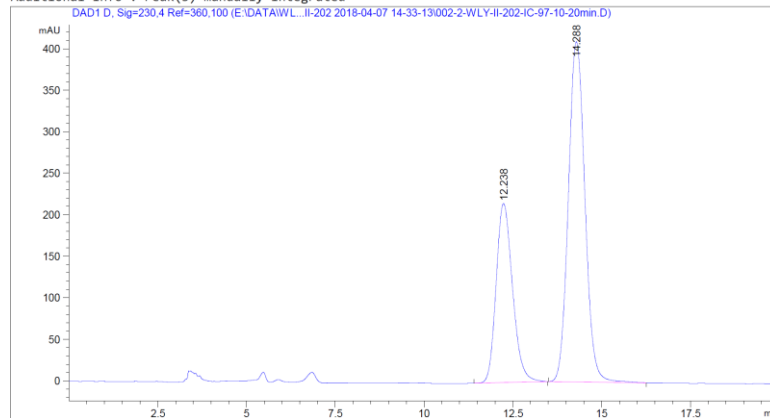

Area Percent Report

Sorted By : Signal  
Multiplier : 1.0000  
Dilution : 1.0000  
Use Multiplier & Dilution Factor with ISTDs

Signal 1: DAD1 D, Sig=230,4 Ref=360,100

| Peak # | RetTime [min] | Type | Width [min] | Area [mAU*s] | Height [mAU] | Area %  |
|--------|---------------|------|-------------|--------------|--------------|---------|
| 1      | 12.238        | BB   | 0.4767      | 6913.74707   | 215.53433    | 34.2861 |
| 2      | 14.288        | BB   | 0.4946      | 1.32511e4    | 409.40289    | 65.7139 |



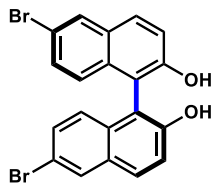

Additional Info : Peak(s) manually integrated

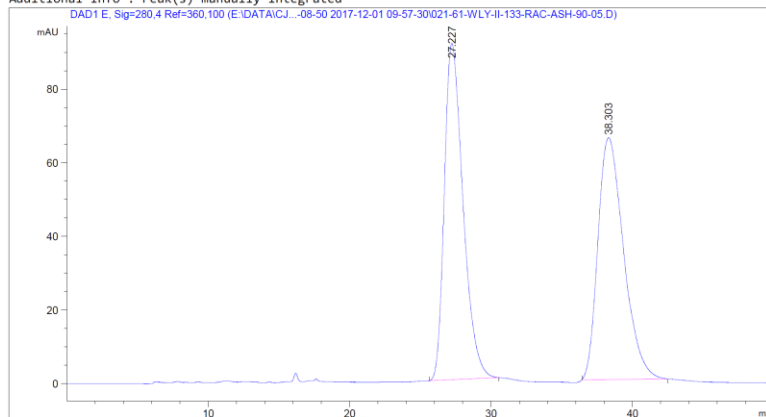

=====  
Area Percent Report  
=====

Sorted By : Signal  
Multiplier : 1.0000  
Dilution : 1.0000  
Use Multiplier & Dilution Factor with ISTDs

Signal 1: DAD1 E, Sig=280,4 Ref=360,100

| Peak # | RetTime [min] | Type | Width [min] | Area [mAU*s] | Height [mAU] | Area %  |
|--------|---------------|------|-------------|--------------|--------------|---------|
| 1      | 27.227        | BB   | 1.0748      | 8392.92383   | 91.40069     | 50.2802 |
| 2      | 38.303        | BB   | 1.4814      | 8299.37695   | 65.71684     | 49.7198 |

Additional Info : Peak(s) manually integrated

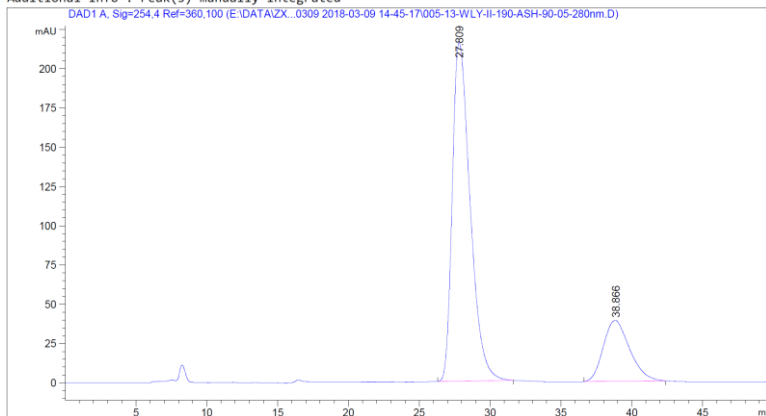

=====  
Area Percent Report  
=====

Sorted By : Signal  
Multiplier : 1.0000  
Dilution : 1.0000  
Use Multiplier & Dilution Factor with ISTDs

Signal 1: DAD1 A, Sig=254,4 Ref=360,100

| Peak # | RetTime [min] | Type | Width [min] | Area [mAU*s] | Height [mAU] | Area %  |
|--------|---------------|------|-------------|--------------|--------------|---------|
| 1      | 27.809        | BB   | 1.0252      | 1.88863e4    | 215.54605    | 79.1298 |
| 2      | 38.866        | BB   | 1.5017      | 4981.18848   | 38.80158     | 20.8702 |

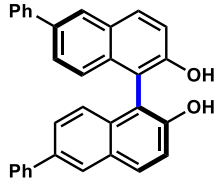

Additional Info : Peak(s) manually integrated

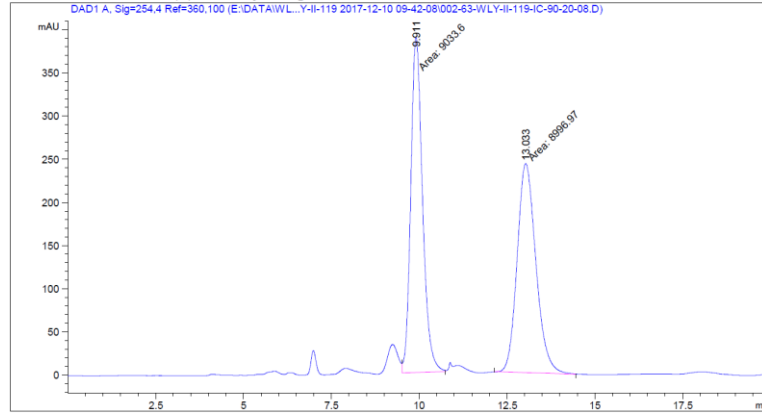

Area Percent Report

Sorted By : Signal  
Multiplier : 1.0000  
Dilution : 1.0000  
Use Multiplier & Dilution Factor with ISTDs

Signal 1: DAD1 A, Sig=254,4 Ref=360,100

| Peak # | RetTime [min] | Type | Width [min] | Area [mAU*s] | Height [mAU] | Area %  |
|--------|---------------|------|-------------|--------------|--------------|---------|
| 1      | 9.911         | MM T | 0.3882      | 9033.59766   | 387.84766    | 50.1016 |
| 2      | 13.033        | MM T | 0.6191      | 8996.97168   | 242.20374    | 49.8984 |

Additional Info : Peak(s) manually integrated

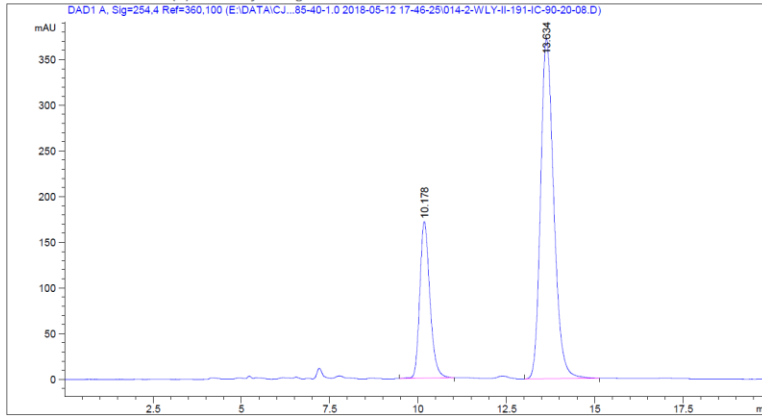

Area Percent Report

Sorted By : Signal  
Multiplier : 1.0000  
Dilution : 1.0000  
Use Multiplier & Dilution Factor with ISTDs

Signal 1: DAD1 A, Sig=254,4 Ref=360,100

| Peak # | RetTime [min] | Type | Width [min] | Area [mAU*s] | Height [mAU] | Area %  |
|--------|---------------|------|-------------|--------------|--------------|---------|
| 1      | 10.178        | BB   | 0.3033      | 3404.15796   | 171.31363    | 26.0270 |
| 2      | 13.634        | BB   | 0.3961      | 9675.18945   | 371.78561    | 73.9730 |

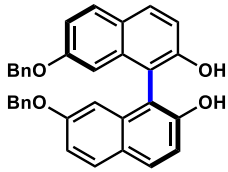

Additional Info : Peak(s) manually integrated

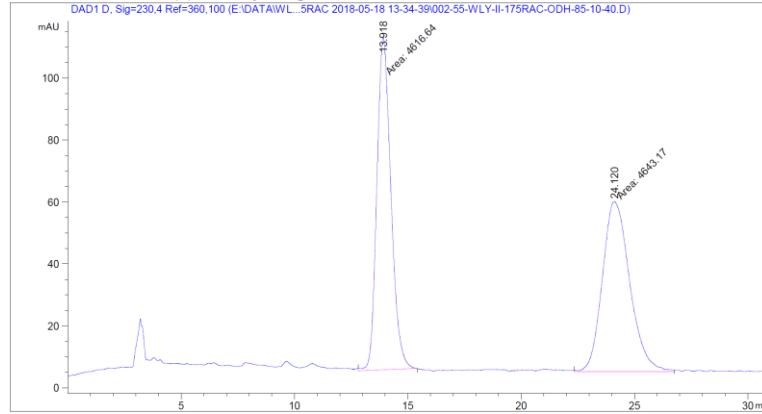

Area Percent Report

Sorted By : Signal  
Multiplier : 1.0000  
Dilution : 1.0000  
Use Multiplier & Dilution Factor with ISTDs

Signal 1: DAD1 D, Sig=230,4 Ref=360,100

| Peak # | RetTime [min] | Type | Width [min] | Area [mAU*s] | Height [mAU] | Area %  |
|--------|---------------|------|-------------|--------------|--------------|---------|
| 1      | 13.918        | MM   | 0.7186      | 4616.64160   | 107.07887    | 49.8568 |
| 2      | 24.120        | MM   | 1.4071      | 4643.16748   | 54.99638     | 50.1432 |

Additional Info : Peak(s) manually integrated

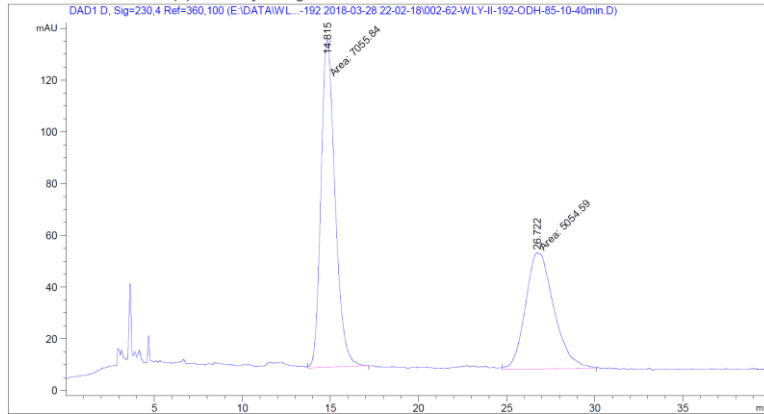

Area Percent Report

Sorted By : Signal  
Multiplier : 1.0000  
Dilution : 1.0000  
Use Multiplier & Dilution Factor with ISTDs

Signal 1: DAD1 D, Sig=230,4 Ref=360,100

| Peak # | RetTime [min] | Type | Width [min] | Area [mAU*s] | Height [mAU] | Area %  |
|--------|---------------|------|-------------|--------------|--------------|---------|
| 1      | 14.815        | MM   | 0.9270      | 7055.84375   | 126.85791    | 58.2625 |
| 2      | 26.722        | MM   | 1.8762      | 5054.59082   | 44.90165     | 41.7375 |

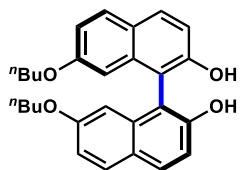

Additional Info : Peak(s) manually integrated

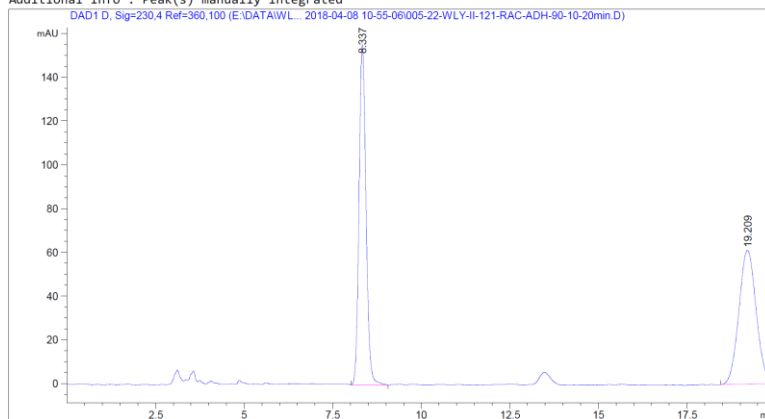

Area Percent Report

Sorted By : Signal  
Multiplier : 1.0000  
Dilution : 1.0000  
Use Multiplier & Dilution Factor with ISTDs

Signal 1: DAD1 D, Sig=230,4 Ref=360,100

| Peak # | RetTime [min] | Type | Width [min] | Area [mAU*s] | Height [mAU] | Area %  |
|--------|---------------|------|-------------|--------------|--------------|---------|
| 1      | 8.337         | BB   | 0.2102      | 2129.50830   | 155.52692    | 50.7481 |
| 2      | 19.209        | BBA  | 0.4113      | 2066.72485   | 61.15033     | 49.2519 |

Additional Info : Peak(s) manually integrated

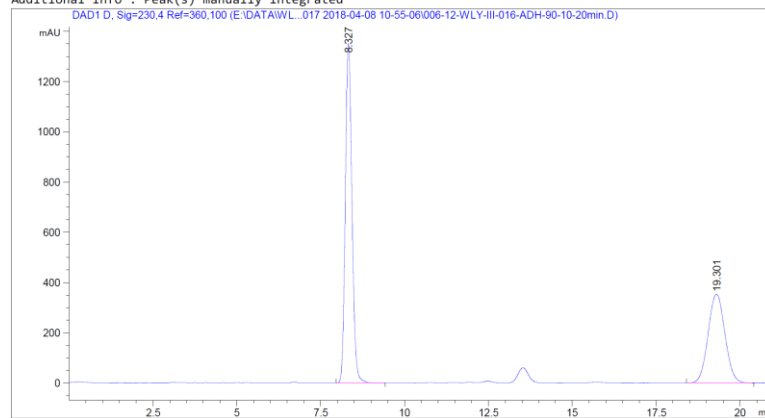

Area Percent Report

Sorted By : Signal  
Multiplier : 1.0000  
Dilution : 1.0000  
Use Multiplier & Dilution Factor with ISTDs

Signal 1: DAD1 D, Sig=230,4 Ref=360,100

| Peak # | RetTime [min] | Type | Width [min] | Area [mAU*s] | Height [mAU] | Area %  |
|--------|---------------|------|-------------|--------------|--------------|---------|
| 1      | 8.327         | BB   | 0.2136      | 1.85824e4    | 1349.92126   | 60.1806 |
| 2      | 19.301        | BB   | 0.5348      | 1.22953e4    | 353.02341    | 39.8194 |

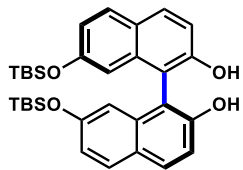

Additional Info : Peak(s) manually integrated

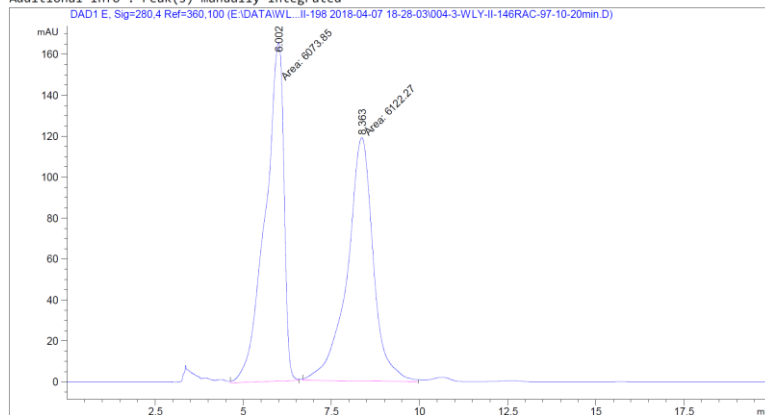

Area Percent Report

Sorted By : Signal  
Multiplier : 1.0000  
Dilution : 1.0000  
Use Multiplier & Dilution Factor with ISTDs

Signal 1: DAD1 E, Sig=280,4 Ref=360,100

| Peak # | RetTime [min] | Type | Width [min] | Area [mAU*s] | Height [mAU] | Area %  |
|--------|---------------|------|-------------|--------------|--------------|---------|
| 1      | 6.002         | MM   | 0.6131      | 6073.85254   | 165.12057    | 49.8015 |
| 2      | 8.363         | MM   | 0.8591      | 6122.27441   | 118.77021    | 50.1985 |

Additional Info : Peak(s) manually integrated

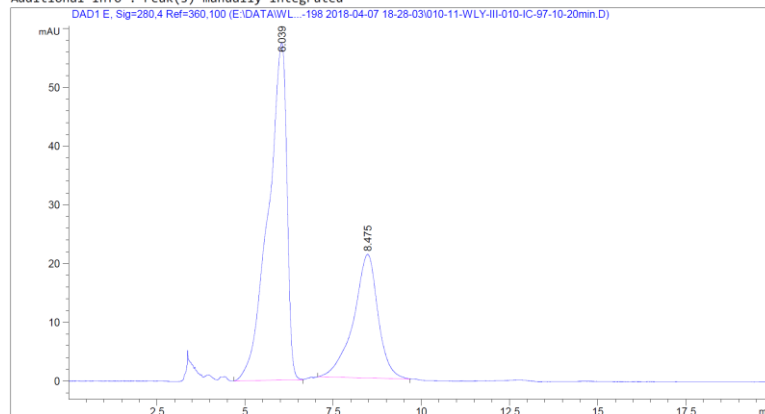

Area Percent Report

Sorted By : Signal  
Multiplier : 1.0000  
Dilution : 1.0000  
Use Multiplier & Dilution Factor with ISTDs

Signal 1: DAD1 E, Sig=280,4 Ref=360,100

| Peak # | RetTime [min] | Type | Width [min] | Area [mAU*s] | Height [mAU] | Area %  |
|--------|---------------|------|-------------|--------------|--------------|---------|
| 1      | 6.039         | BB   | 0.4912      | 2114.36255   | 57.40987     | 67.5320 |
| 2      | 8.475         | BB   | 0.5674      | 1016.54102   | 21.05134     | 32.4680 |

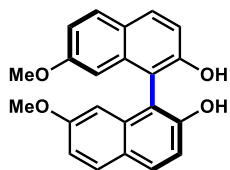

Additional Info : Peak(s) manually integrated

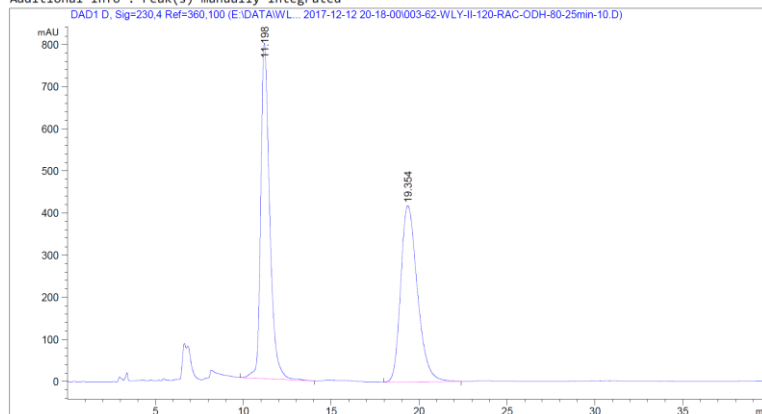

Area Percent Report

Sorted By : Signal  
Multiplier : 1.0000  
Dilution : 1.0000  
Use Multiplier & Dilution Factor with ISTDs

Signal 1: DAD1 D, Sig=230,4 Ref=360,100

| Peak # | RetTime [min] | Type | Width [min] | Area [mAU*s] | Height [mAU] | Area %  |
|--------|---------------|------|-------------|--------------|--------------|---------|
| 1      | 11.198        | BB   | 0.5319      | 2.80968e4    | 795.80017    | 50.5371 |
| 2      | 19.354        | BB   | 0.9584      | 2.74996e4    | 418.07074    | 49.4629 |

Additional Info : Peak(s) manually integrated

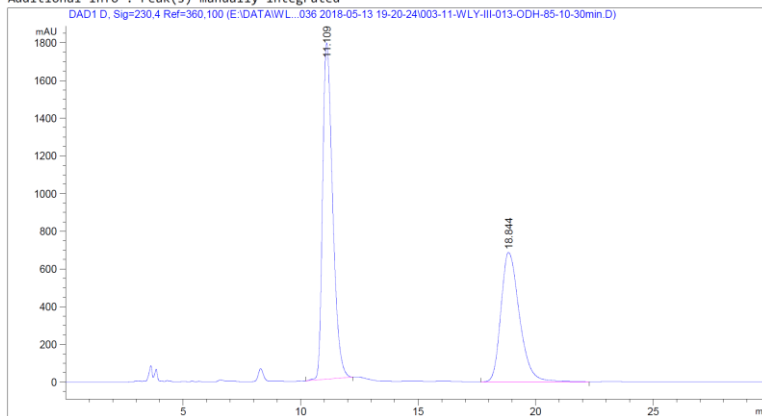

Area Percent Report

Sorted By : Signal  
Multiplier : 1.0000  
Dilution : 1.0000  
Use Multiplier & Dilution Factor with ISTDs

Signal 1: DAD1 D, Sig=230,4 Ref=360,100

| Peak # | RetTime [min] | Type | Width [min] | Area [mAU*s] | Height [mAU] | Area %  |
|--------|---------------|------|-------------|--------------|--------------|---------|
| 1      | 11.109        | BB   | 0.4422      | 5.29766e4    | 1785.46069   | 58.5455 |
| 2      | 18.844        | BB   | 0.7919      | 3.75114e4    | 687.09198    | 41.4545 |
